# Supplementary material for: A consensus and saturated genetic map provides insight into genome anchoring, synteny of Solanaceae and leaf- and fruit-related QTLs in wolfberry (Lycium Linn.)
Source: PubMed Central journal article supplement (PMC8306383; doi:10.1186/s12870-021-03115-1), 2021-07-24

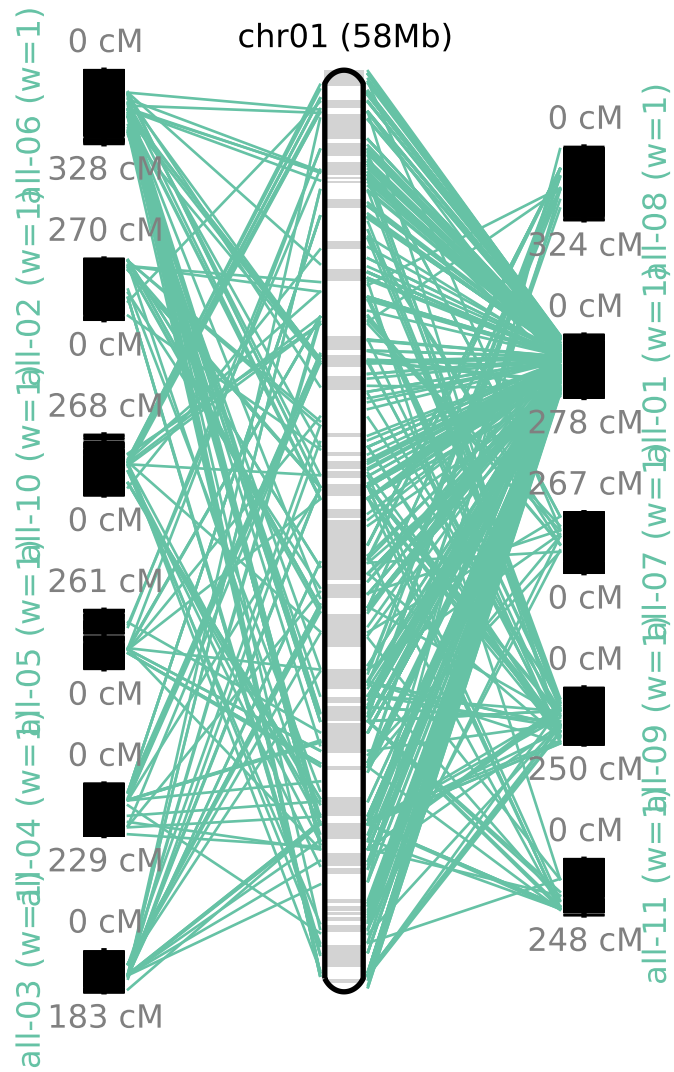

all-10 all-08 all-09 all-07 all-06 all-04 all-05 all-03 all-02 all-01

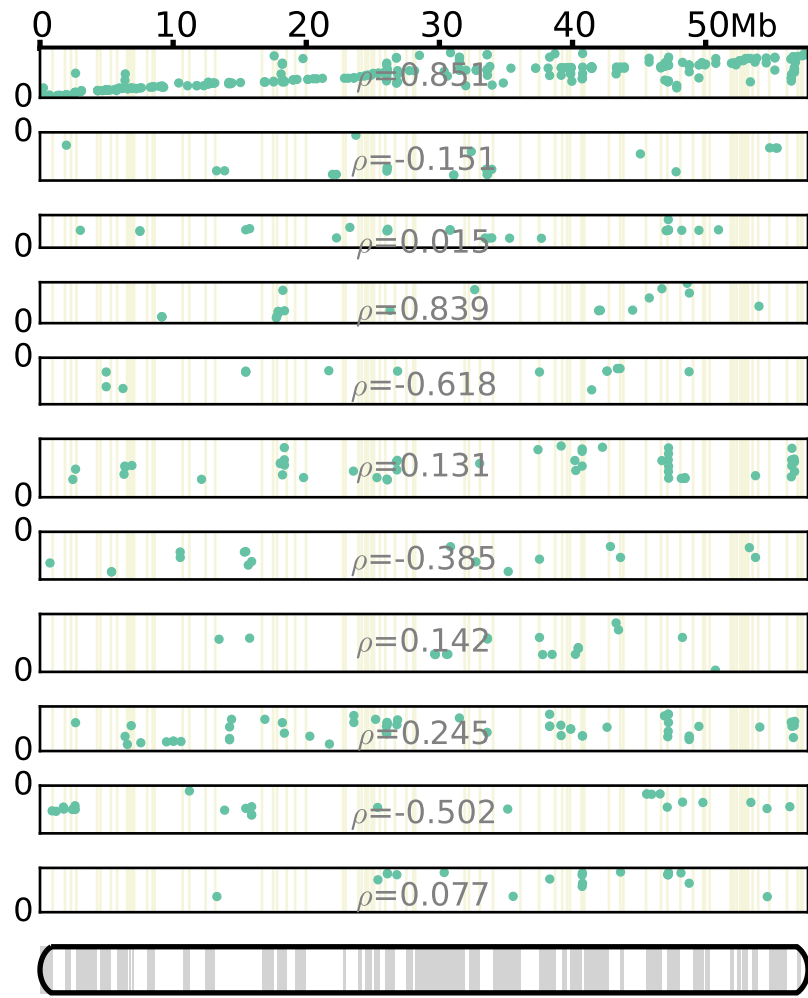

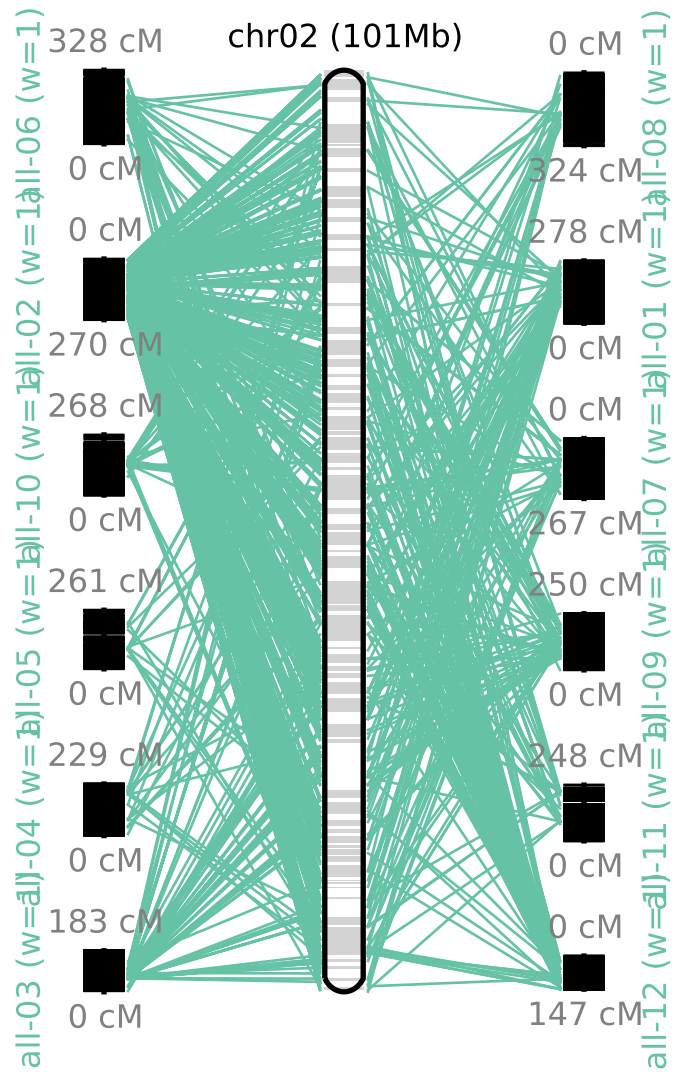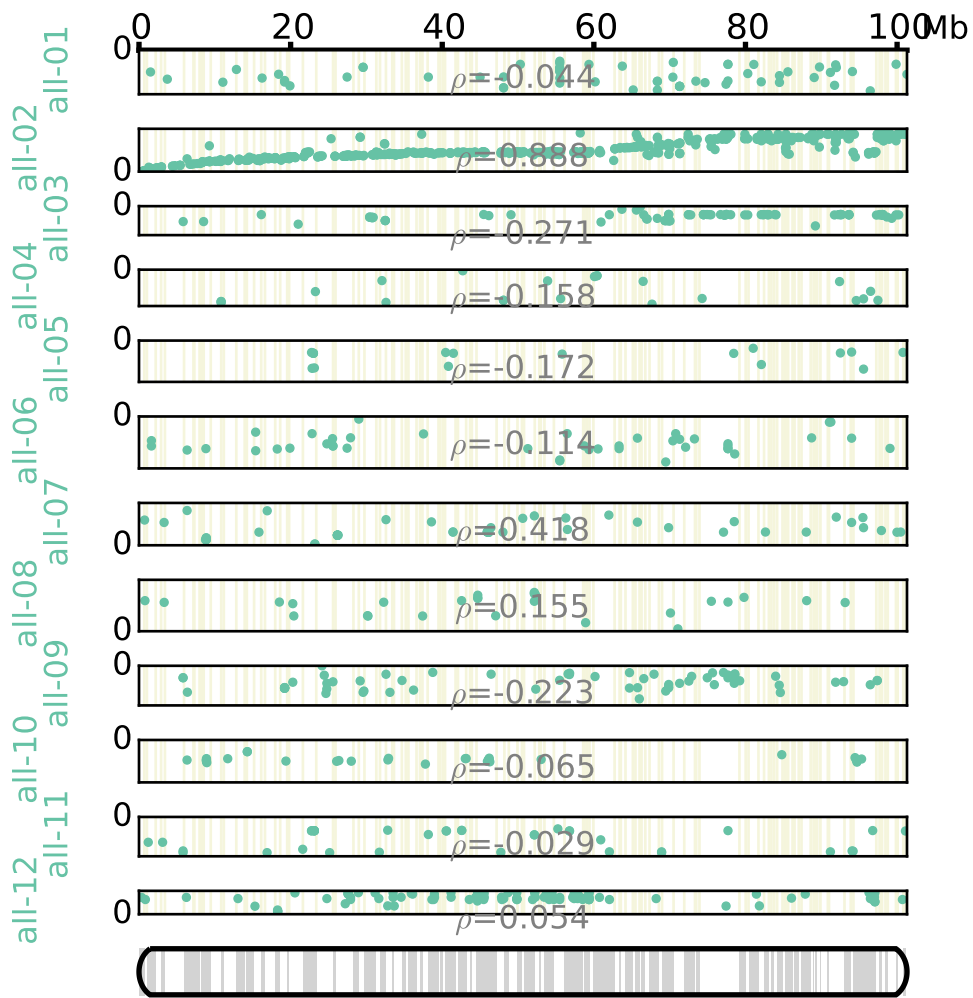

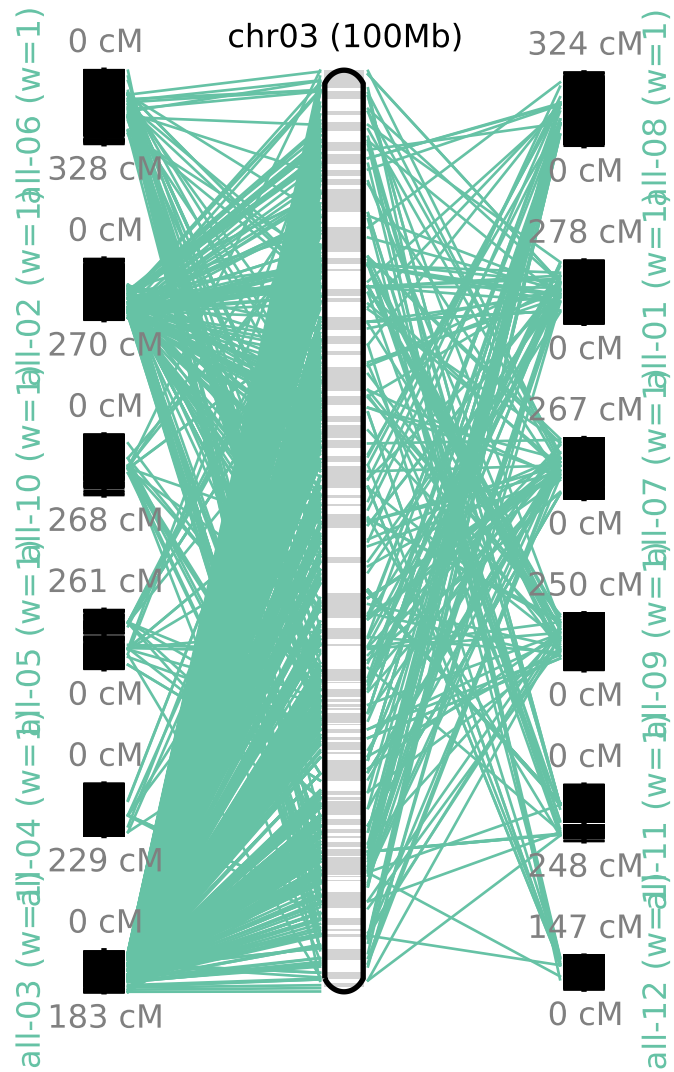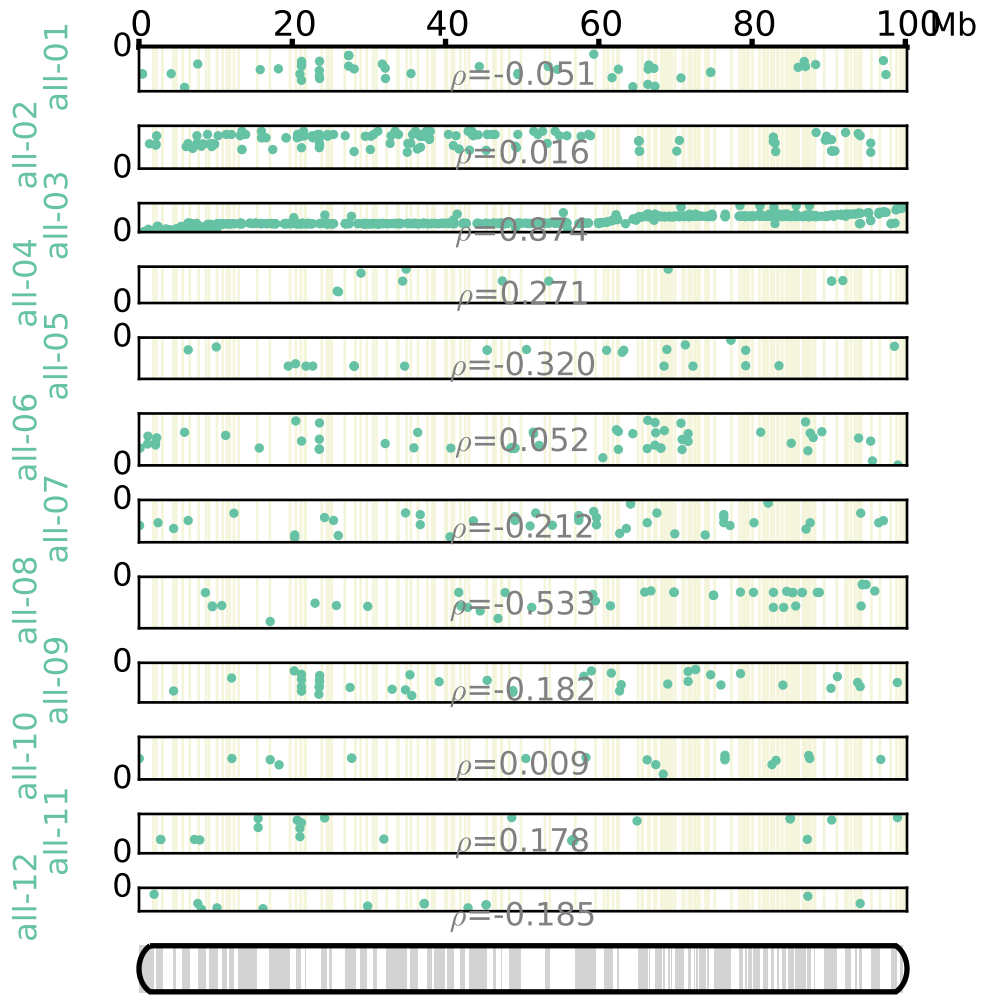

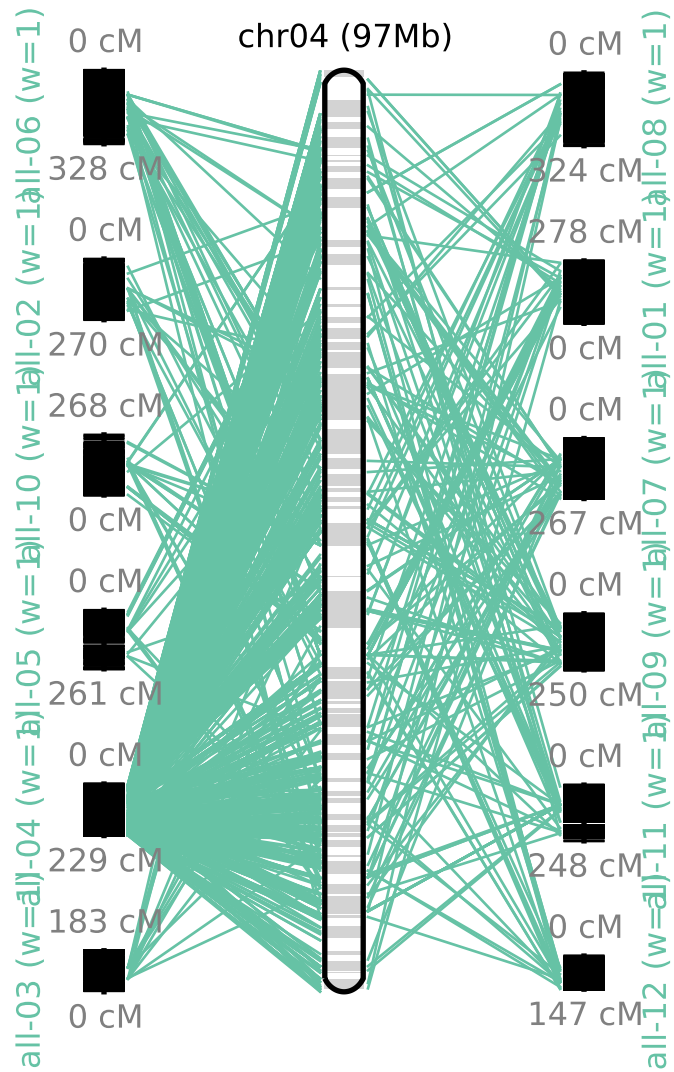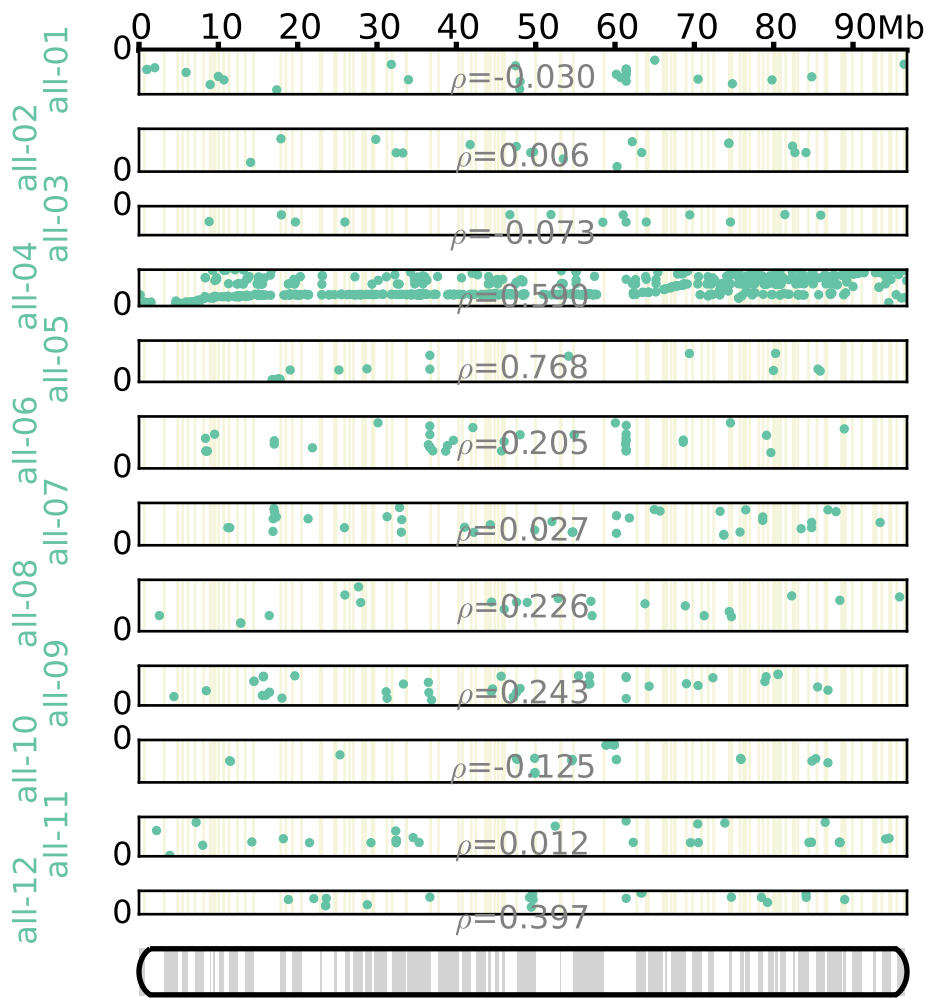

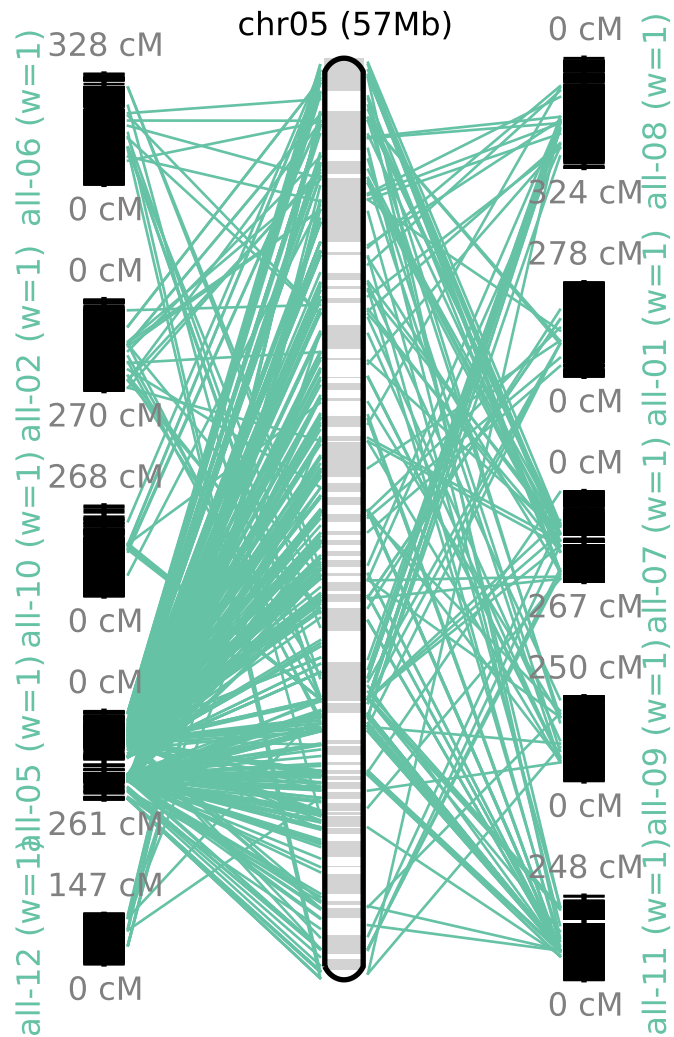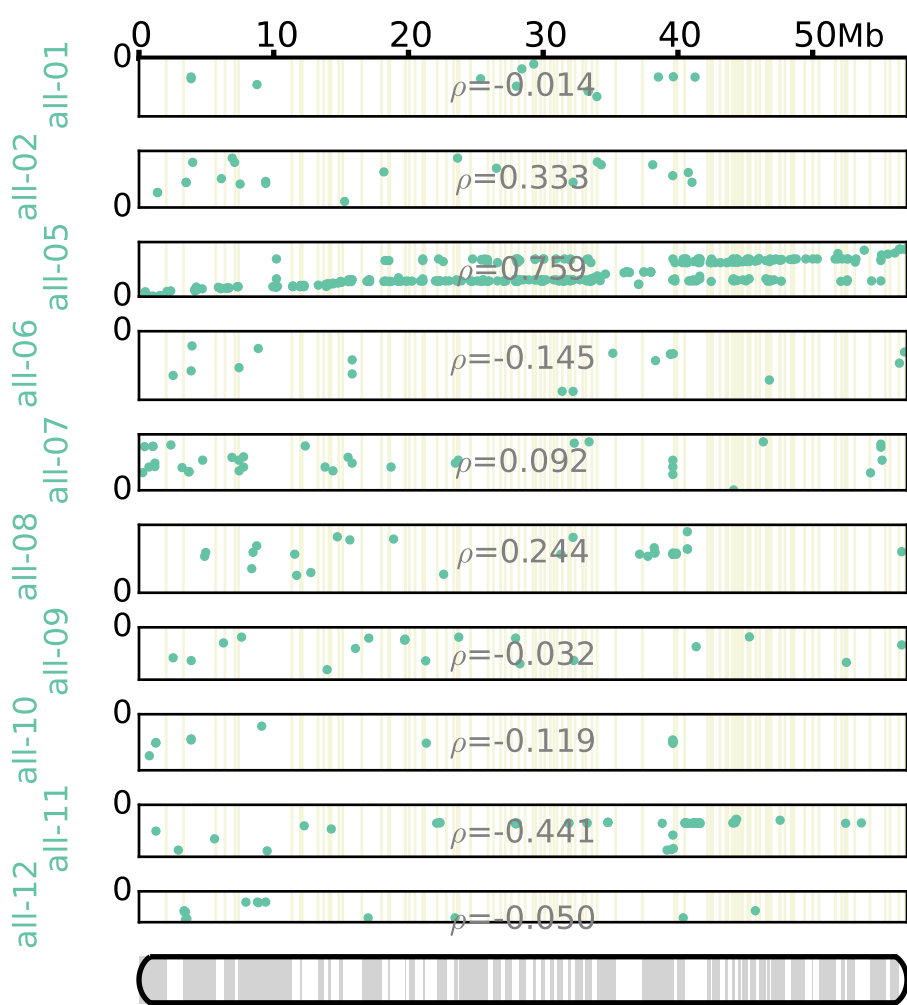

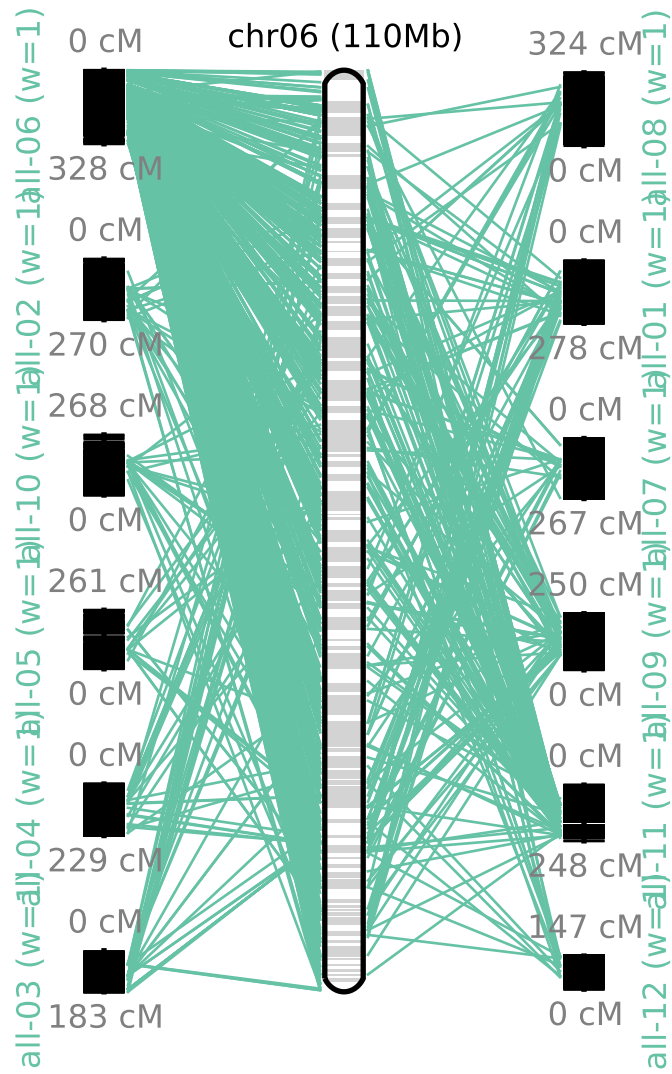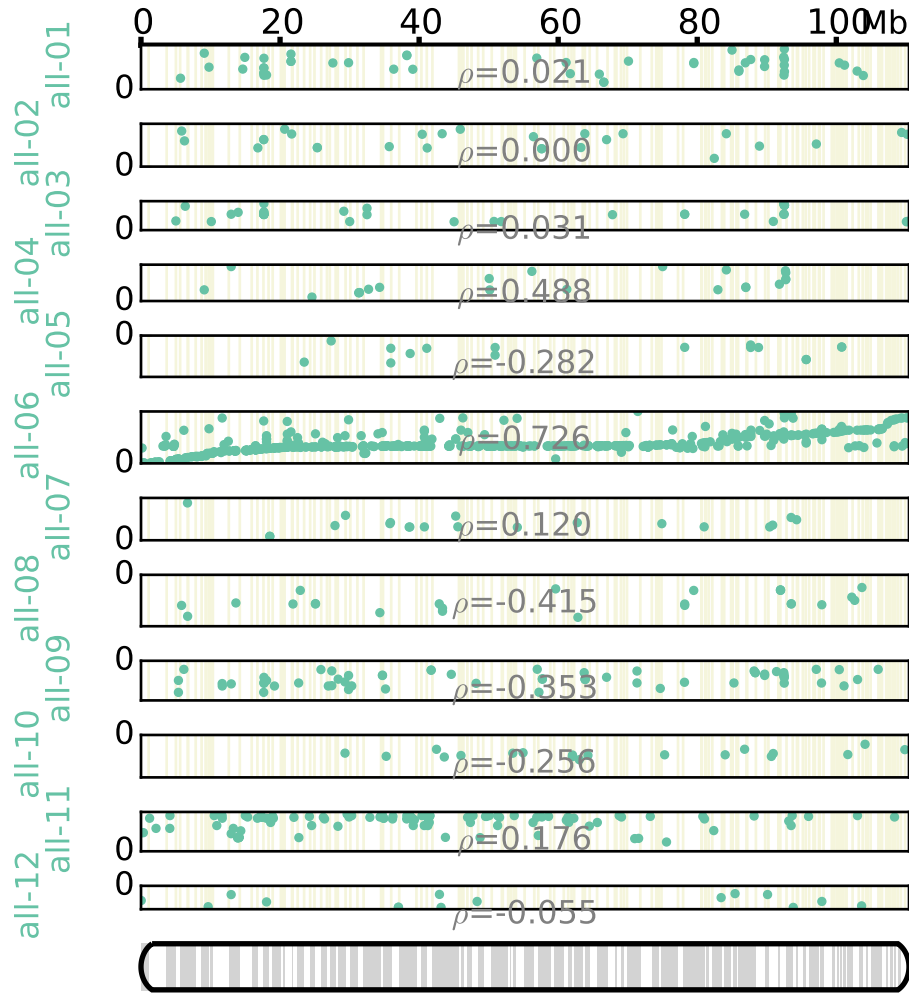

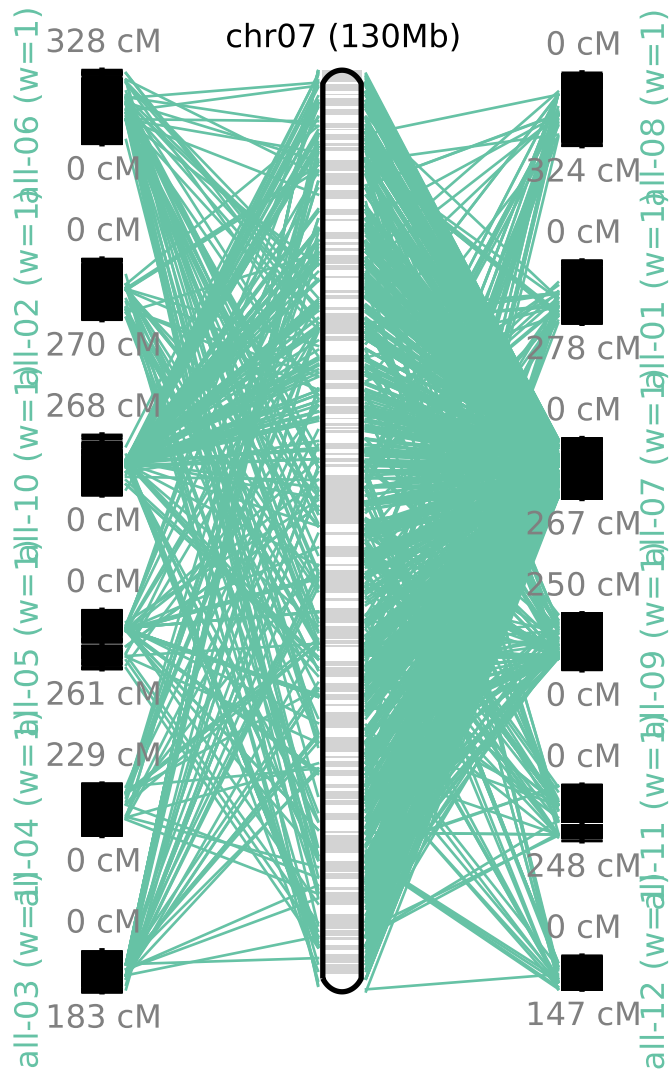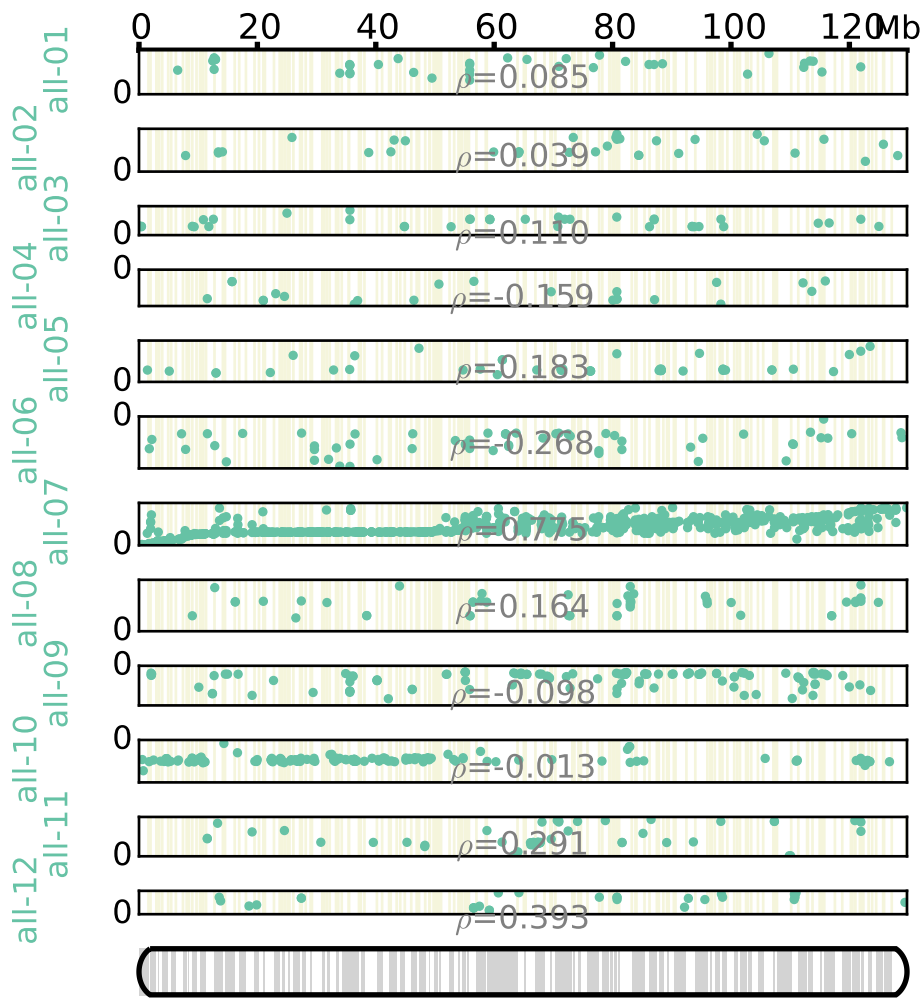

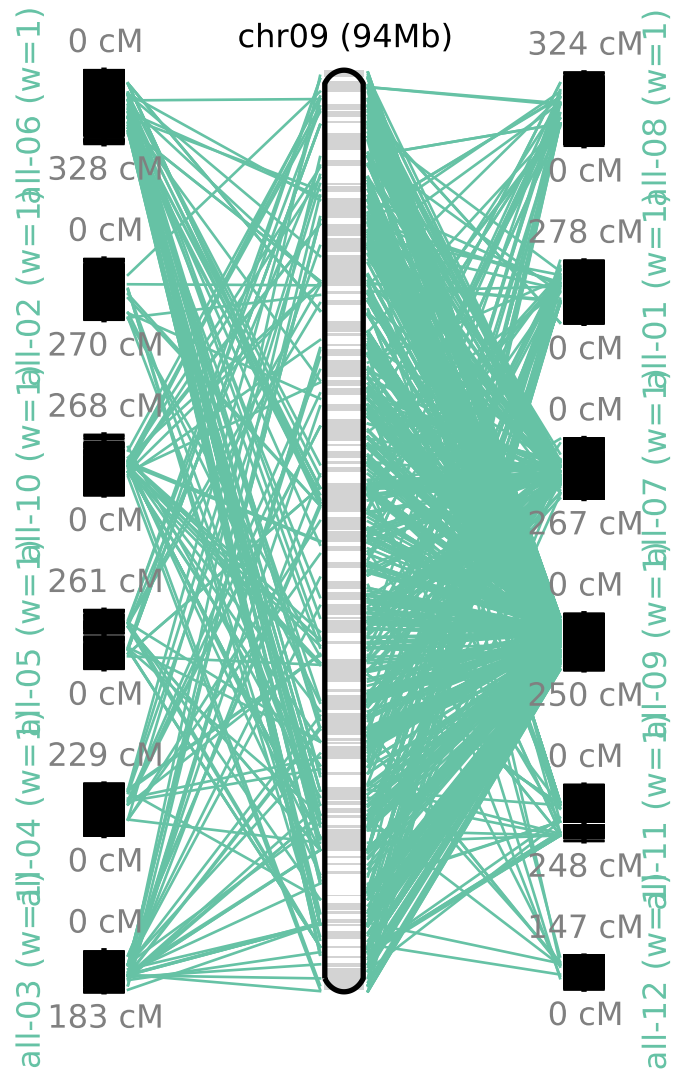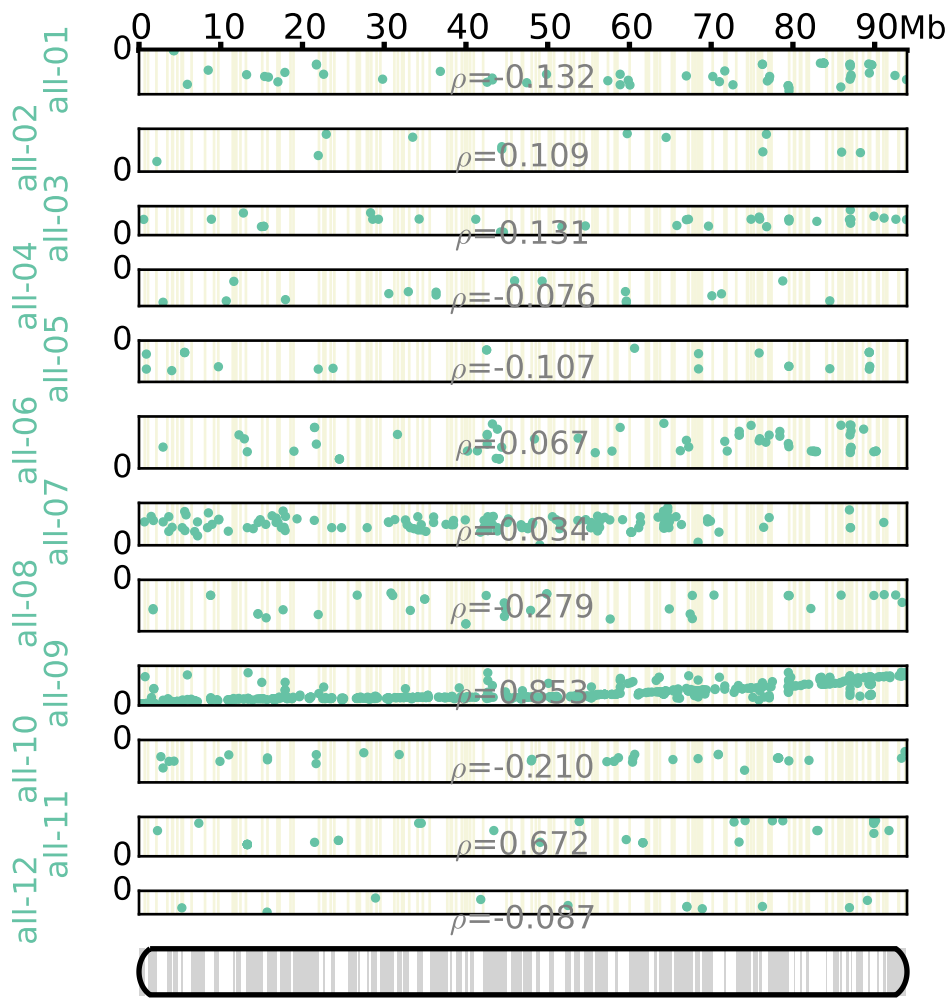



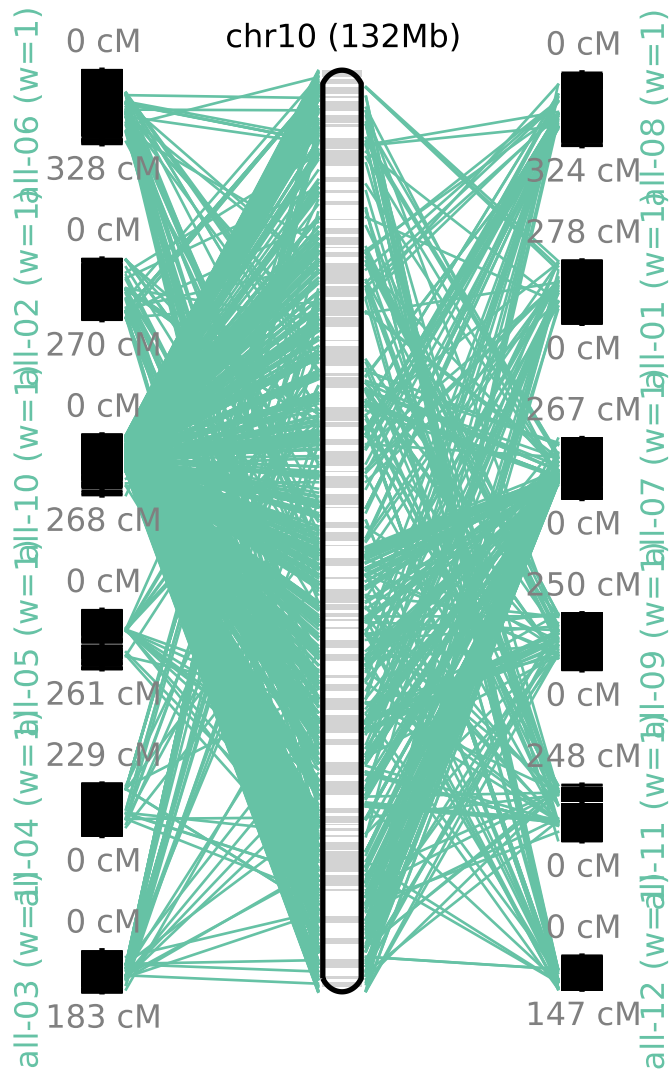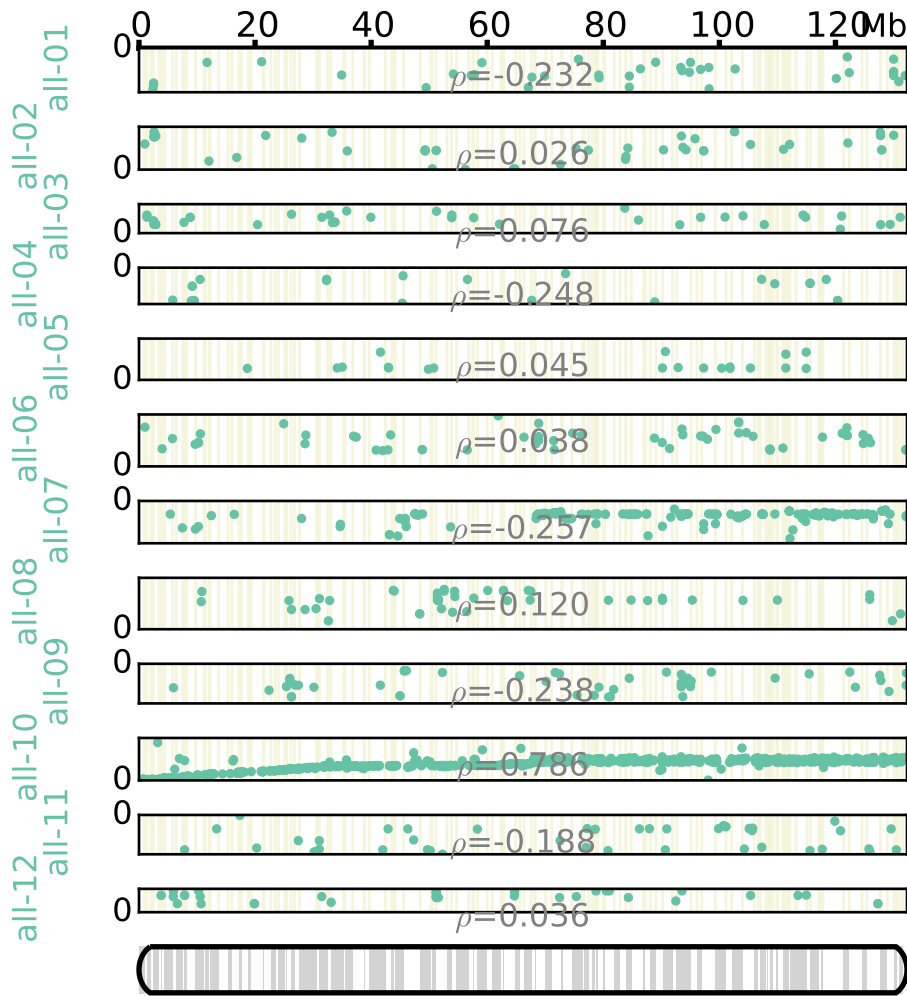

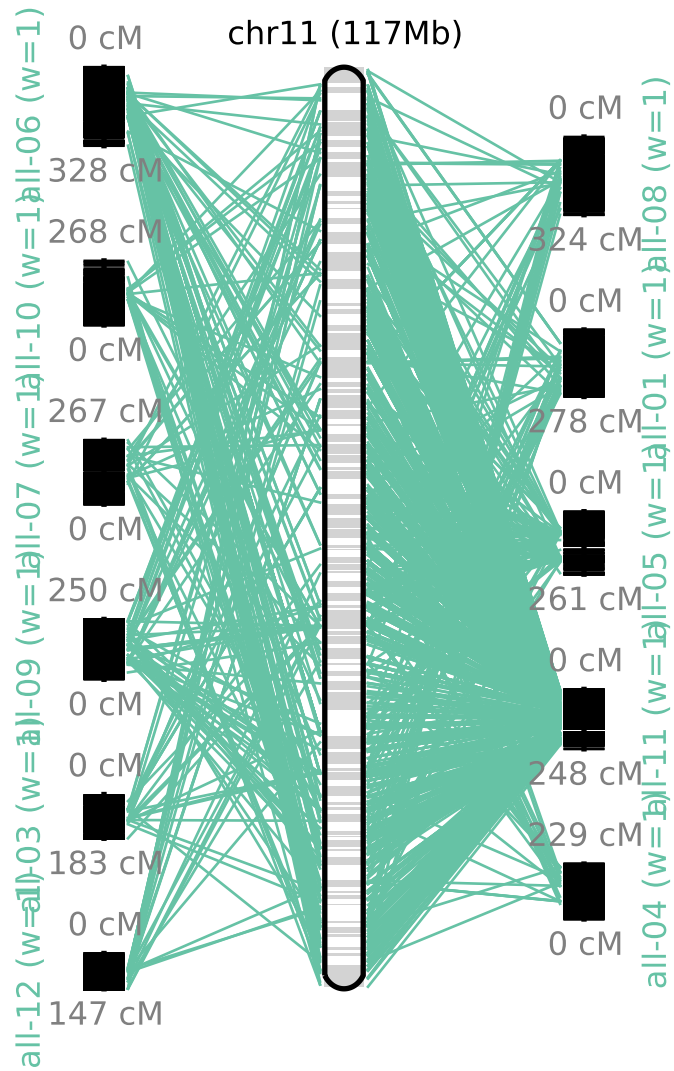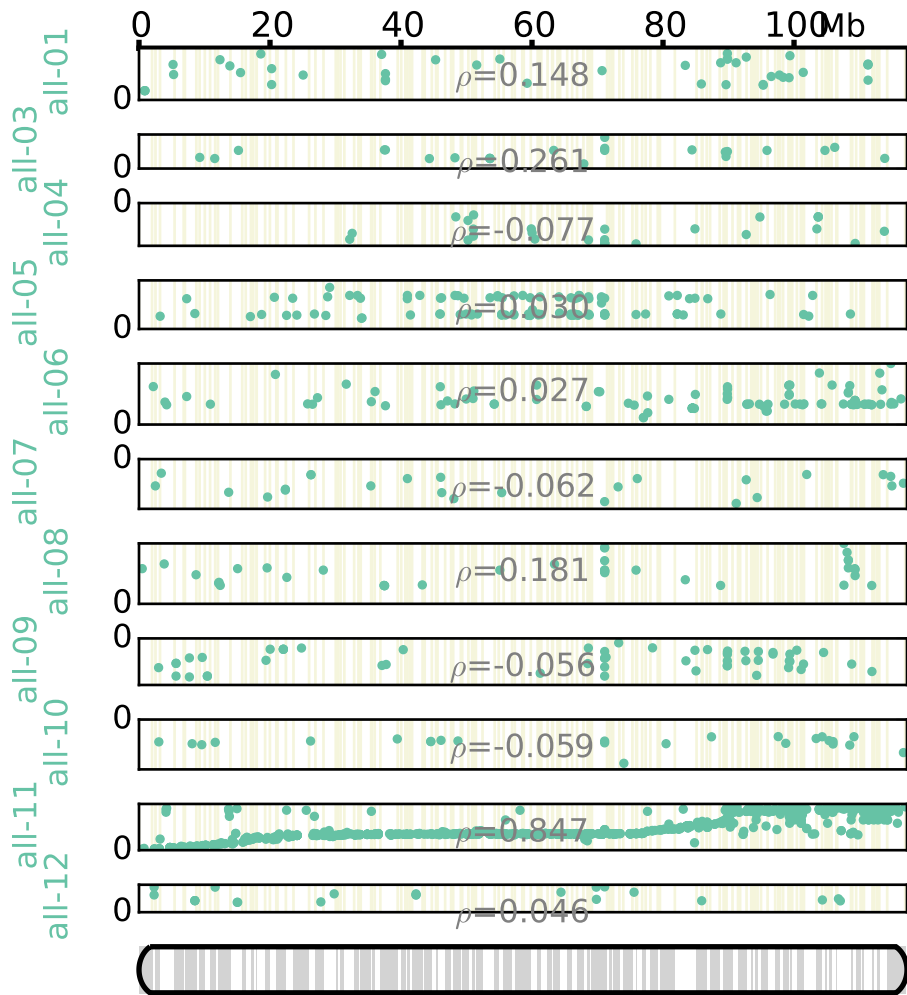

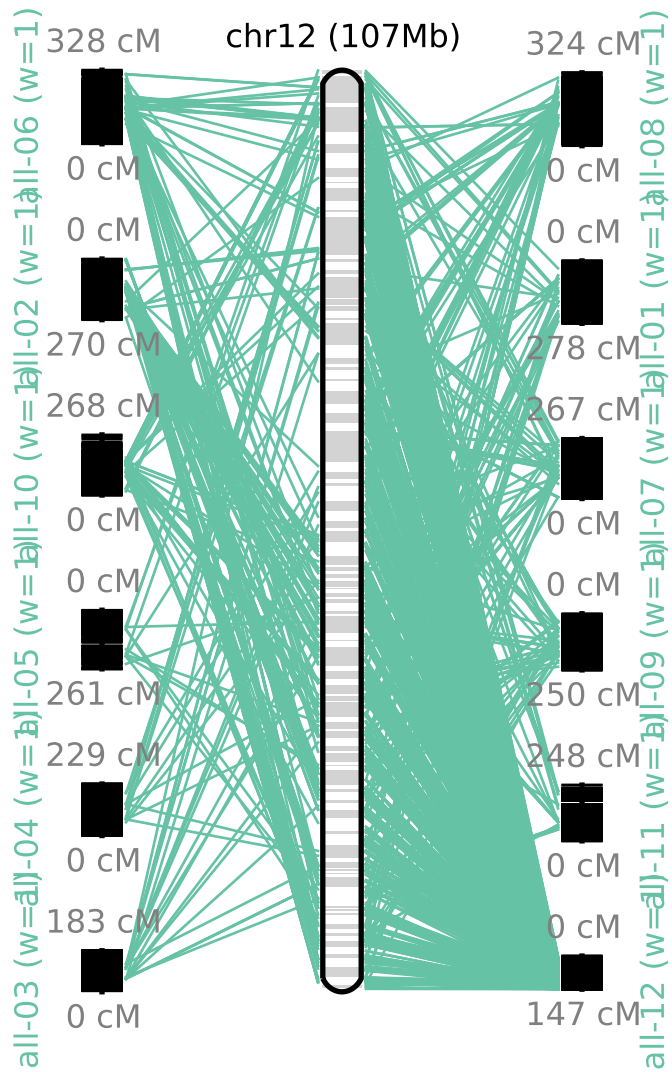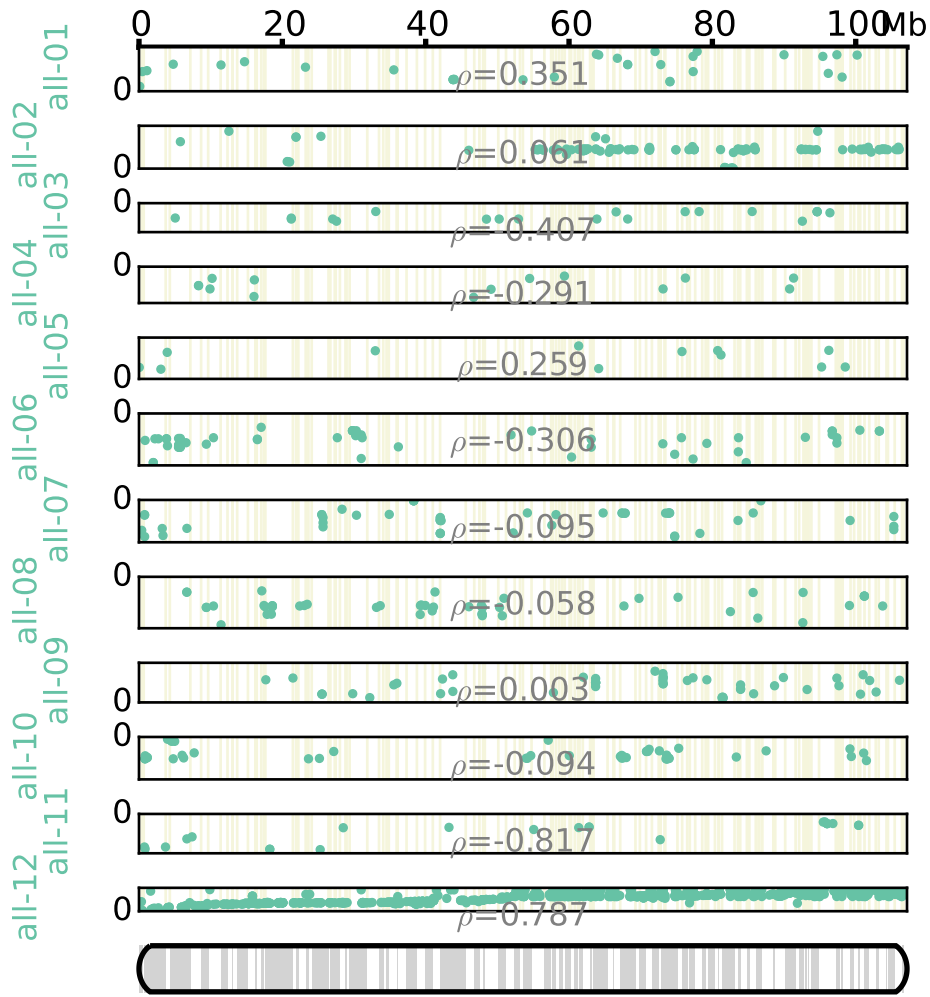

Supplement: 12870_2021_3115_MOESM2_ESM.pdf [file 12870_2021_3115_MOESM2_ESM.pdf]
