# Supplementary material for: A consensus and saturated genetic map provides insight into genome anchoring, synteny of Solanaceae and leaf- and fruit-related QTLs in wolfberry (Lycium Linn.)
Source: BMC Plant Biol. 2021 Jul 24;21:350. doi: 10.1186/s12870-021-03115-1 (PMC8306383; doi:10.1186/s12870-021-03115-1)
Supplement: Supplementary file 4 — Additional file 4: Table 2. QTLs detected in the F1 population. [file 12870_2021_3115_MOESM4_ESM.xlsx]

## Sheet: LOD＞2.5
Supplementary Table 2 QTLs detected in the F1 population
Trait	Year	Linkage Group	Position	Locus	LOD	Variance	PVE
Leaf length	2018	1	17.354	Marker4819836	2.67	49.1887	7.1
Leaf length	2018		28.588	Marker2128405	2.9	45.6306	13.8
Leaf length	2018		28.588	Marker5352118	2.9	45.627	13.8
Leaf length	2018		28.588	Marker2627800	2.9	45.6233	13.8
Leaf length	2018		28.905	Marker8617257	2.89	45.6031	13.8
Leaf length	2018		29.854	Marker1651130	2.85	48.423	8.5
Leaf length	2018		30.814	Marker8703853	2.67	48.9585	7.5
Leaf length	2018		31.773	Marker3285723	2.98	48.7198	8
Leaf length	2018		33.046	Marker5655205	2.95	49.0597	7.3
Leaf length	2018		33.682	Marker2135147	3.03	49.1047	7.2
Leaf length	2018		33.682	Marker7302304	3.03	49.1024	7.2
Leaf length	2018		35.47	Marker8280732	2.93	48.8304	7.7
Leaf length	2018		35.47	Marker6400931	2.93	48.8278	7.8
Leaf length	2018		35.47	Marker5949489	2.93	48.8251	7.8
Leaf length	2018		36.06	Marker1595860	2.99	48.6017	8.2
Leaf length	2018	3	70.942	Marker8314793	3.05	48.9039	7.6
Leaf length	2018		108.647	Marker7871119	2.51	49.7367	6
Leaf length	2018		109.116	Marker5274084	2.77	49.4264	6.6
Leaf length	2018		109.116	Marker5065064	2.77	49.4265	6.6
Leaf length	2018		109.116	Marker5274085	2.77	49.4266	6.6
Leaf length	2018		109.15	Marker4908357	2.76	49.4365	6.6
Leaf length	2018		109.618	Marker4760495	2.62	49.5532	6.4
Leaf length	2018		110.121	Marker8550216	2.63	49.4856	6.5
Leaf length	2018		110.623	Marker8309877	2.6	49.48	6.5
Leaf length	2018		111.126	Marker4760496	2.61	49.4408	6.6
Leaf length	2016	4	112.63	Marker3192763	2.93	52.4817	10.9
Leaf length	2016		113.777	Marker500658	2.77	55.2007	6.3
Leaf length	2016		113.777	Marker525407	2.77	55.1931	6.3
Leaf length	2016		113.777	Marker2546162	2.77	55.189	6.3
Leaf length	2016		113.777	Marker6989841	2.77	55.2008	6.3
Leaf length	2016		113.777	Marker320856	2.77	55.1916	6.3
Leaf length	2016		113.777	Marker4170157	2.77	55.1997	6.3
Leaf length	2016		113.777	Marker6024894	2.9	54.6356	7.2
Leaf length	2016		113.777	Marker6617745	2.9	54.6421	7.2
Leaf length	2016		113.777	Marker6444903	2.9	54.6481	7.2
Leaf length	2016		114.538	Marker6398540	2.77	55.1874	6.3
Leaf length	2016		114.923	Marker4133740	2.84	54.9593	6.7
Leaf length	2016		114.923	Marker5536034	2.84	54.9558	6.7
Leaf length	2016		114.923	Marker8188751	2.84	54.9522	6.7
Leaf length	2016		114.923	Marker5320505	2.84	54.9486	6.7
Leaf length	2016		115.308	Marker7315073	2.96	54.5364	7.4
Leaf length	2018	6	183.754	Marker1933121	3.03	48.3118	8.7
Leaf length	2018		183.754	Marker3275921	3.03	48.3144	8.7
Leaf length	2018		183.754	Marker1058056	3.03	48.317	8.7
Leaf length	2018		183.754	Marker616268	3.03	48.3196	8.7
Leaf length	2018		184.511	Marker5865455	3.16	48.2838	8.8
Leaf length	2018		186.032	Marker5865456	3.35	48.372	8.6
Leaf length	2018		187.553	Marker2987258	2.71	49.4931	6.5
Leaf length	2018		187.553	Marker201714	2.7	49.5031	6.5
Leaf length	2018		187.553	Marker3730301	2.7	49.5132	6.5
Leaf length	2018		187.553	Marker5893375	2.7	49.5132	6.5
Leaf length	2018		187.553	Marker2964207	2.7	49.5132	6.5
Leaf length	2018		187.553	Marker1011365	2.7	49.5132	6.5
Leaf length	2018		187.553	Marker397175	2.7	49.5132	6.5
Leaf length	2018		187.553	Marker1717956	2.69	49.5146	6.5
Leaf length	2018		188.654	Marker6656859	2.52	49.6756	6.1
Leaf length	2016	9	38.881	Marker1796031	3.55	54.1307	8.1
Leaf length	2016		38.881	Marker5838082	3.55	54.1312	8.1
Leaf length	2016		38.881	Marker5117720	3.55	54.1317	8.1
Leaf length	2016		38.881	Marker3916279	3.55	54.1322	8.1
Leaf length	2016		38.881	Marker8527857	3.55	54.1327	8.1
Leaf length	2016		38.881	Marker1485739	3.55	54.1332	8.1
Leaf length	2016		40.061	Marker693000	3.28	54.5106	7.4
Leaf length	2016		40.061	Marker975616	3.28	54.5151	7.4
Leaf length	2016		40.061	Marker2829063	3.28	54.5198	7.4
Leaf length	2016		40.061	Marker7581014	3.27	54.5244	7.4
Leaf length	2016		40.286	Marker4248415	3.21	54.6176	7.3
Leaf length	2016		40.286	Marker8229097	3.22	54.6168	7.3
Leaf length	2016		40.286	Marker6870075	3.22	54.616	7.3
Leaf length	2016		40.286	Marker623008	3.22	54.6151	7.3
Leaf length	2016		40.286	Marker312844	3.22	54.6144	7.3
Leaf length	2016		41.163	Marker6129994	3.17	54.6712	7.2
Leaf length	2016		41.163	Marker7317051	3.17	54.6739	7.2
Leaf length	2016		41.219	Marker7675435	3.16	54.6874	7.1
Leaf length	2016		41.219	Marker7281855	3.16	54.6868	7.1
Leaf length	2016		41.219	Marker3485138	3.16	54.6863	7.1
Leaf length	2016		41.219	Marker5038361	3.16	54.6857	7.1
Leaf length	2016		41.219	Marker5273443	3.16	54.6852	7.1
Leaf length	2016		42.146	Marker8438804	2.9	54.9982	6.6
Leaf length	2016		42.146	Marker8438806	2.9	54.9986	6.6
Leaf length	2016		42.146	Marker5182538	2.9	54.9991	6.6
Leaf length	2016		42.146	Marker825264	2.9	54.9995	6.6
Leaf length	2016		42.61	Marker5986209	2.7	55.2805	6.1
Leaf length	2016		42.61	Marker603208	2.7	55.2809	6.1
Leaf length	2016		42.824	Marker7717324	2.77	55.1844	6.3
Leaf length	2016		42.824	Marker7740921	2.77	55.1798	6.3
Leaf length	2016		42.824	Marker7740238	2.78	55.1752	6.3
Leaf length	2016		42.824	Marker8209329	2.78	55.1706	6.3
Leaf length	2016		42.824	Marker190701	2.78	55.166	6.3
Leaf length	2016		43.542	Marker2546422	2.99	54.8784	6.8
Leaf length	2016		43.542	Marker5117721	2.99	54.8779	6.8
Leaf length	2016		44.475	Marker7047310	3.24	54.5209	7.4
Leaf length	2016		44.475	Marker4221146	3.24	54.5205	7.4
Leaf length	2016		44.475	Marker6995484	3.24	54.52	7.4
Leaf length	2016		64.013	Marker3914987	2.7	55.1738	6.3
Leaf length	2016		64.692	Marker6994374	2.62	55.2516	6.2
Leaf length	2016		145.366	Marker5401999	2.56	55.2909	6.1
Leaf length	2016		145.366	Marker4540179	2.56	55.2902	6.1
Leaf length	2016		145.366	Marker2840224	2.56	55.2895	6.1
Leaf length	2016		145.366	Marker8273117	2.56	55.2888	6.1
Leaf length	2016		145.366	Marker3605506	2.56	55.2881	6.1
Leaf length	2016		147.873	Marker5402013	2.92	54.9374	6.7
Leaf length	2016		149.039	Marker2430470	2.91	55.0028	6.6
Leaf length	2016		149.536	Marker8188832	2.9	55.0034	6.6
Leaf length	2016		149.536	Marker5919311	2.9	55.0028	6.6
Leaf length	2016		149.536	Marker6268619	2.9	55.0023	6.6
Leaf length	2016		149.536	Marker1346501	2.9	55.0017	6.6
Leaf length	2016		149.536	Marker7302886	2.9	55.0011	6.6
Leaf length	2016		149.536	Marker4339075	2.96	54.9339	6.7
Leaf length	2016		149.536	Marker5729004	2.96	54.9345	6.7
Leaf length	2016		149.536	Marker347468	2.96	54.9351	6.7
Leaf length	2016		149.536	Marker8431912	2.96	54.9357	6.7
Leaf length	2016		149.536	Marker243646	2.96	54.9362	6.7
Leaf length	2016		149.536	Marker1505703	2.96	54.9368	6.7
Leaf length	2016		149.765	Marker4057851	2.96	54.9379	6.7
Leaf length	2016		149.765	Marker6606746	2.96	54.9374	6.7
Leaf length	2016		149.765	Marker3196739	2.97	54.9338	6.7
Leaf length	2016		149.765	Marker3852727	2.97	54.9333	6.7
Leaf length	2016		149.765	Marker5351702	2.97	54.9327	6.7
Leaf length	2016		149.765	Marker6237448	2.98	54.8421	6.9
Leaf length	2016		150.858	Marker3412823	2.91	54.9953	6.6
Leaf length	2016		150.858	Marker2835321	2.91	54.9959	6.6
Leaf length	2016		151.198	Marker7741120	2.86	55.0872	6.5
Leaf length	2016		151.219	Marker99171	2.85	55.0924	6.4
Leaf length	2016		152.685	Marker3196738	2.76	55.1379	6.4
Leaf length	2016		152.685	Marker6392518	2.76	55.1398	6.4
Leaf length	2016		153.705	Marker6649537	2.59	55.3688	6
Leaf length	2016		153.705	Marker5402016	2.59	55.3682	6
Leaf length	2016		153.705	Marker4237058	2.59	55.3675	6
Leaf length	2016		153.705	Marker6268621	2.58	55.3669	6
Leaf length	2016		153.705	Marker5224751	2.58	55.3663	6
Leaf length	2016		153.705	Marker1504979	2.86	54.9621	6.7
Leaf length	2016		153.705	Marker287927	2.86	54.9628	6.7
Leaf length	2016		153.705	Marker7581015	2.86	54.9634	6.7
Leaf length	2016		153.705	Marker1331102	2.86	54.9641	6.7
Leaf length	2016		153.705	Marker4015345	2.86	54.9647	6.7
Leaf length	2016		153.705	Marker7502935	2.86	54.9654	6.7
Leaf length	2016		155.291	Marker8486554	3.16	54.6165	7.3
Leaf length	2016		155.291	Marker6957760	3.16	54.6159	7.3
Leaf length	2016		155.652	Marker4799660	3.19	54.6039	7.3
Leaf length	2016		156.211	Marker8431798	3.16	54.6658	7.2
Leaf length	2016		157.874	Marker7676107	2.9	55.0314	6.6
Leaf length	2016		157.874	Marker1189772	2.9	55.0314	6.6
Leaf length	2016		157.874	Marker6733915	2.9	55.0314	6.6
Leaf length	2016		157.874	Marker2076371	2.9	55.0314	6.6
Leaf length	2016		157.874	Marker3087901	2.9	55.0314	6.6
Leaf length	2016		157.874	Marker6593793	2.9	55.0309	6.6
Leaf length	2016		157.874	Marker98756	2.9	55.0304	6.6
Leaf length	2016		157.874	Marker6134800	2.9	55.0314	6.6
Leaf length	2016		157.874	Marker1342887	2.9	55.0314	6.6
Leaf length	2016		157.874	Marker5241793	2.9	55.0314	6.6
Leaf length	2016		157.874	Marker2139499	2.9	55.0298	6.6
Leaf length	2016		157.874	Marker7899358	2.9	55.0304	6.6
Leaf length	2016		157.874	Marker867362	2.9	55.0309	6.6
Leaf length	2016		157.874	Marker8723811	2.9	55.0314	6.6
Leaf length	2016		157.874	Marker6206606	2.9	55.0314	6.6
Leaf length	2016		157.874	Marker316638	2.9	55.0314	6.6
Leaf length	2016		157.874	Marker7913049	2.9	55.0314	6.6
Leaf length	2016		158.379	Marker6392276	2.96	54.9501	6.7
Leaf length	2016		158.379	Marker2561999	2.96	54.9501	6.7
Leaf length	2016		158.379	Marker316636	2.96	54.9501	6.7
Leaf length	2016		158.379	Marker6970275	2.96	54.9518	6.7
Leaf length	2016		158.379	Marker7913050	2.96	54.9536	6.7
Leaf length	2017		40.061	Marker693000	2.53	54.2764	8
Leaf length	2017		40.061	Marker975616	2.54	54.2738	8
Leaf length	2017		40.061	Marker2829063	2.54	54.2712	8
Leaf length	2017		40.061	Marker7581014	2.54	54.2686	8
Leaf length	2017		40.286	Marker4248415	2.59	54.2157	8.1
Leaf length	2017		40.286	Marker8229097	2.59	54.2157	8.1
Leaf length	2017		40.286	Marker6870075	2.59	54.2157	8.1
Leaf length	2017		40.286	Marker623008	2.59	54.2157	8.1
Leaf length	2017		40.286	Marker312844	2.59	54.2157	8.1
Leaf length	2017		41.163	Marker6129994	2.62	54.1556	8.2
Leaf length	2017		41.163	Marker7317051	2.62	54.1547	8.2
Leaf length	2017		41.219	Marker7675435	2.62	54.1426	8.2
Leaf length	2017		41.219	Marker7281855	2.62	54.1413	8.2
Leaf length	2017		41.219	Marker3485138	2.62	54.14	8.2
Leaf length	2017		41.219	Marker5038361	2.62	54.1387	8.2
Leaf length	2017		41.219	Marker5273443	2.62	54.1374	8.2
Leaf width	2016	3	49.917	Marker2172429	2.65	5.77935	6
Leaf width	2016		49.917	Marker5968516	2.65	5.77923	6
Leaf width	2016		73.533	Marker4295459	2.76	5.7507	6.5
Leaf width	2016		87.329	Marker1162356	2.66	5.3981	12.2
Leaf width	2016		87.832	Marker963126	2.55	5.41819	11.9
Leaf width	2018		54.277	Marker7913397	2.53	5.89178	6.1
Leaf width	2018		54.277	Marker6282438	2.53	5.89209	6.1
Leaf width	2016	4	112.63	Marker3192763	2.51	5.74897	6.5
Leaf width	2017	7	61.916	Marker3012123	2.6	112.45	23.4
Leaf width	2017		61.916	Marker7298758	2.59	112.655	23.2
Leaf width	2017		61.916	Marker234488	2.58	112.861	23.1
Leaf width	2017		61.916	Marker4640778	2.57	113.078	23
Leaf width	2017		147.012	Marker8569027	3.35	70.7878	51.8
Leaf width	2017		165.001	Marker1651871	2.77	110.12	25
Leaf index	2017	1	164.04	Marker6830862	3.32	139.183	9.8
Leaf index	2017		164.04	Marker1467864	3.32	139.183	9.8
Leaf index	2017		164.542	Marker3275955	3.27	139.398	9.7
Leaf index	2017		165.045	Marker8150627	3.28	139.325	9.7
Leaf index	2017		165.045	Marker6318793	3.28	139.325	9.7
Leaf index	2017		165.045	Marker8565821	3.28	139.325	9.7
Leaf index	2017		165.045	Marker4788919	3.28	139.325	9.7
Leaf index	2017		165.045	Marker1402728	3.28	139.325	9.7
Leaf index	2017		165.045	Marker5530157	3.28	139.325	9.7
Leaf index	2017		165.045	Marker1231034	3.28	139.325	9.7
Leaf index	2017		165.045	Marker8623693	3.28	139.325	9.7
Leaf index	2017		166.055	Marker6957765	3.24	139.504	9.6
Leaf index	2017		167.065	Marker5767102	3.18	139.798	9.4
Leaf index	2017		167.568	Marker3197196	3.4	138.819	10
Leaf index	2017		167.568	Marker7122181	3.4	138.819	10
Leaf index	2017		168.07	Marker229987	3.41	138.793	10.1
Leaf index	2017		168.573	Marker4724417	2.78	141.518	8.3
Leaf index	2017		169.075	Marker7882278	2.56	142.524	7.6
Leaf index	2017		169.578	Marker372700	2.53	142.654	7.6
Leaf index	2017		170.08	Marker4908938	2.53	142.654	7.6
Leaf index	2016	4	102.173	Marker4544463	11.91	0.15972	52.2
Leaf index	2016		102.173	Marker7315018	11.9	0.159725	52.2
Leaf index	2016		102.173	Marker2968525	11.89	0.159731	52.2
Leaf index	2016	6	68.302	Marker6491505	12.82	0.178277	46.6
Leaf index	2016		68.302	Marker4867111	11.81	0.179866	46.1
Leaf index	2016		68.302	Marker3011789	11.8	0.179867	46.1
Leaf index	2016		68.302	Marker3881498	11.8	0.179874	46.1
Leaf index	2016		68.302	Marker3440341	11.79	0.179882	46.1
Leaf index	2016		68.302	Marker1595467	11.79	0.179889	46.1
Leaf index	2016		72.712	Marker8082802	5.77	0.287831	13.8
Leaf index	2016		72.712	Marker1563668	5.78	0.287793	13.8
Leaf index	2016		72.963	Marker5984261	6.69	0.212092	36.5
Leaf index	2016		72.963	Marker5838272	6.77	0.210877	36.8
Leaf index	2016		72.963	Marker8673746	6.85	0.209833	37.1
Leaf index	2016		72.963	Marker3710550	6.92	0.208927	37.4
Leaf index	2016		73.214	Marker804396	6.27	0.22386	32.9
Leaf index	2016		75.488	Marker14286	12.03	0.181218	45.7
Leaf index	2016		75.488	Marker7631791	11.22	0.182779	45.3
Leaf index	2016		75.993	Marker3577270	8.43	0.184282	44.8
Leaf index	2016		75.993	Marker3946420	8.41	0.184311	44.8
Leaf index	2016		75.993	Marker1346093	8.39	0.18434	44.8
Leaf index	2016		75.993	Marker7362789	8.36	0.184369	44.8
Leaf index	2016		77.276	Marker2371461	5.46	0.290776	12.9
Leaf index	2016		77.276	Marker649926	5.46	0.290776	12.9
Leaf index	2016		77.276	Marker5224154	5.46	0.290776	12.9
Leaf index	2016		77.276	Marker1563671	5.46	0.290776	12.9
Leaf index	2016		77.276	Marker7681175	5.47	0.290496	13
Leaf index	2016		77.276	Marker8122742	5.48	0.29021	13.1
Leaf index	2016		77.276	Marker6421815	5.48	0.289918	13.2
Leaf index	2016		77.276	Marker3164230	5.49	0.28962	13.2
Leaf index	2016		77.276	Marker5984258	5.46	0.290776	12.9
Leaf index	2016		77.276	Marker6150257	5.5	0.289316	13.3
Leaf index	2016		77.276	Marker8005922	5.49	0.28962	13.2
Leaf index	2016		77.276	Marker5650189	5.48	0.289918	13.2
Leaf index	2016		77.276	Marker8275213	5.48	0.29021	13.1
Leaf index	2016		77.276	Marker105036	5.47	0.290496	13
Leaf index	2016		77.276	Marker7604295	5.46	0.290776	12.9
Leaf index	2016		77.276	Marker309267	5.46	0.290776	12.9
Leaf index	2016		77.276	Marker4907862	5.46	0.290776	12.9
Leaf index	2016		77.276	Marker5984112	5.46	0.290776	12.9
Leaf index	2016		77.276	Marker6003574	5.45	0.290801	12.9
Leaf index	2016		77.59	Marker3906244	4.78	0.290762	12.9
Leaf index	2016		77.59	Marker6063632	4.79	0.290516	13
Leaf index	2016		77.59	Marker5837835	4.79	0.290266	13.1
Leaf index	2016		77.59	Marker5273673	4.8	0.290009	13.1
Leaf index	2016		77.904	Marker5946656	4.98	0.279528	16.3
Leaf index	2016		77.904	Marker8438446	4.92	0.278171	16.7
Leaf index	2016		77.904	Marker4282660	4.99	0.278903	16.5
Leaf index	2016		77.904	Marker2383069	4.99	0.27934	16.3
Leaf index	2016		77.904	Marker6780502	4.98	0.279845	16.2
Leaf index	2016		77.904	Marker5211576	4.97	0.28034	16
Leaf index	2016		77.904	Marker5266334	4.97	0.280811	15.9
Leaf index	2016		78.535	Marker3316208	5.46	0.290747	12.9
Leaf index	2016		78.535	Marker4716896	5.48	0.290544	13
Leaf index	2016		79.04	Marker1255600	6	0.286706	14.1
Leaf index	2016		79.04	Marker99054	6	0.286706	14.1
Leaf index	2016		79.04	Marker7547063	6	0.286706	14.1
Leaf index	2016		79.04	Marker5273347	6	0.286706	14.1
Leaf index	2016		79.04	Marker5660269	6	0.286706	14.1
Leaf index	2016		79.545	Marker3946857	5.46	0.290747	12.9
Leaf index	2016		79.545	Marker4716893	5.46	0.290762	12.9
Leaf index	2016		80.086	Marker2627994	4.9	0.284496	14.8
Leaf index	2016		80.086	Marker1256474	4.91	0.284132	14.9
Leaf index	2016		80.086	Marker5534154	4.92	0.283752	15
Leaf index	2016		80.086	Marker6656860	4.92	0.283369	15.1
Leaf index	2016		80.086	Marker8576124	4.93	0.282975	15.2
Leaf index	2016		81.708	Marker3440340	9.34	0.190008	43.1
Leaf index	2016		81.708	Marker3242481	9.32	0.190048	43.1
Leaf index	2016		81.708	Marker5314382	9.31	0.190088	43.1
Leaf index	2016		82.249	Marker2628167	9.95	0.194161	41.8
Leaf index	2016		82.249	Marker5984351	9.93	0.194222	41.8
Leaf index	2016		82.249	Marker8006114	9.91	0.194283	41.8
Leaf index	2016		83.342	Marker72217	4.66	0.296426	11.2
Leaf index	2016		83.342	Marker4716894	4.63	0.296752	11.1
Leaf index	2016		83.342	Marker6712503	4.61	0.297085	11
Leaf index	2016		83.342	Marker7987054	4.61	0.297085	11
Leaf index	2016		83.342	Marker6025177	4.61	0.297085	11
Leaf index	2016		83.342	Marker6120759	4.61	0.297085	11
Leaf index	2016		83.342	Marker7923358	4.61	0.297083	11
Leaf index	2016		84.355	Marker5702184	4.61	0.297082	11
Leaf index	2016		84.355	Marker5702183	4.61	0.297082	11
Leaf index	2016		84.355	Marker3820449	4.61	0.297081	11
Leaf index	2016		84.967	Marker3881495	4.52	0.296852	11.1
Leaf index	2016		84.967	Marker6002927	4.52	0.29685	11.1
Leaf index	2016		85.578	Marker5273176	4.4	0.296731	11.1
Leaf index	2016		88.741	Marker8564969	3.03	0.273803	18
Leaf index	2016		89.007	Marker7155188	3.96	0.198256	40.6
Leaf index	2016		89.007	Marker6391861	3.99	0.198119	40.7
Leaf index	2016		89.007	Marker6063524	4.02	0.197986	40.7
Leaf index	2016		89.007	Marker3715976	4.05	0.197852	40.7
Leaf index	2016		91.408	Marker2154108	10.06	0.193618	42
Leaf index	2016		91.673	Marker6022756	7.55	0.194178	41.8
Leaf index	2016		91.673	Marker5984259	7.52	0.194254	41.8
Leaf index	2016		91.939	Marker7904977	8.21	0.1873	43.9
Leaf index	2016		92.474	Marker8407448	3.62	0.304071	8.9
Leaf index	2016		92.474	Marker6760319	3.61	0.304211	8.9
Leaf index	2016		92.518	Marker391177	3.6	0.304802	8.7
Leaf index	2016		92.518	Marker7771296	3.6	0.304802	8.7
Leaf index	2016		92.518	Marker6941368	3.6	0.304801	8.7
Leaf index	2016		92.518	Marker6769724	3.6	0.3048	8.7
Leaf index	2016		92.518	Marker72215	3.6	0.3048	8.7
Leaf index	2016		92.518	Marker5554036	3.66	0.302207	9.5
Leaf index	2016		92.739	Marker5493809	3.69	0.301481	9.7
Leaf index	2016		92.739	Marker8369738	3.69	0.301304	9.7
Leaf index	2016		92.739	Marker5224941	3.7	0.301124	9.8
Leaf index	2016		92.739	Marker1086817	3.7	0.300941	9.9
Leaf index	2016		92.739	Marker7718050	3.71	0.300755	9.9
Leaf index	2016		94.34	Marker1129725	9.08	0.181577	45.6
Leaf index	2016		94.34	Marker7208681	9.07	0.18159	45.6
Leaf index	2016		94.606	Marker5666359	8.78	0.181774	45.6
Leaf index	2016		94.606	Marker6022757	8.76	0.181789	45.5
Leaf index	2016		94.606	Marker6970399	8.75	0.181804	45.5
Leaf index	2016		94.606	Marker4696280	8.74	0.181819	45.5
Leaf index	2016		98.707	Marker2592225	3.77	0.193664	42
Leaf index	2016		98.707	Marker7835208	3.75	0.193734	42
Leaf index	2018		160.855	Marker6676115	2.79	0.25881	6.7
Leaf index	2018		160.855	Marker2309293	2.79	0.258808	6.7
Leaf index	2018		160.855	Marker4053664	2.79	0.258807	6.7
Leaf index	2018		160.855	Marker8681658	2.79	0.258805	6.7
Leaf index	2018		160.855	Marker7837187	2.79	0.258804	6.7
Leaf index	2018		160.855	Marker6881713	2.79	0.258802	6.7
Leaf index	2018		160.855	Marker8438414	2.79	0.258794	6.7
Leaf index	2018		161.612	Marker7915710	2.56	0.259775	6.3
Leaf index	2018		161.612	Marker456879	2.56	0.259768	6.3
Leaf index	2018		161.612	Marker456878	2.56	0.259761	6.3
Leaf index	2018		161.612	Marker2839869	2.56	0.259752	6.3
Leaf index	2016	7	61.916	Marker3012123	5.43	0.25001	25.1
Leaf index	2016		61.916	Marker7298758	5.42	0.250064	25.1
Leaf index	2016		61.916	Marker234488	5.41	0.250118	25.1
Leaf index	2016		61.916	Marker4640778	5.41	0.250173	25.1
Leaf index	2016		152.652	Marker4033267	2.69	0.302895	9.3
Leaf index	2016		152.652	Marker954233	2.67	0.302164	9.5
Leaf index	2016		152.652	Marker8387321	2.67	0.302189	9.5
Leaf index	2016	10	38.653	Marker3471464	3.16	0.238225	28.6
Leaf index	2016		45.687	Marker5172860	7.52	0.224432	32.8
Leaf index	2016		45.687	Marker8450607	7.52	0.224431	32.8
Leaf index	2016		45.687	Marker2516583	7.52	0.22443	32.8
Leaf index	2016		45.687	Marker265097	7.52	0.224428	32.8
Leaf index	2016		45.687	Marker6031822	6.42	0.224199	32.8
Leaf index	2016		45.967	Marker5197396	13.11	0.162113	51.4
Leaf index	2016		46.808	Marker4028292	10.26	0.175645	47.4
Leaf index	2016		47.087	Marker2153560	6.39	0.273685	18
Leaf index	2016		47.087	Marker6419082	4.48	0.298015	10.7
Leaf index	2016		47.087	Marker2153593	4.48	0.297968	10.7
Leaf index	2016		47.087	Marker887157	4.48	0.297945	10.8
Leaf index	2016		47.087	Marker8604998	4.48	0.297944	10.8
Leaf index	2016		47.087	Marker7670764	4.48	0.297965	10.8
Leaf index	2016		47.087	Marker7587205	7.68	0.237908	28.7
Leaf index	2016		47.087	Marker8024429	4.48	0.298082	10.7
Leaf index	2016		47.592	Marker5417105	7.21	0.232938	30.2
Leaf index	2016		47.592	Marker276459	7.23	0.232768	30.3
Leaf index	2016		47.844	Marker5541524	5.26	0.230207	31
Leaf index	2016		48.598	Marker2150851	7.03	0.236645	29.1
Leaf index	2016		48.598	Marker7768211	6.8	0.236922	29
Leaf index	2016		48.598	Marker265159	6.27	0.253775	24
Leaf index	2016		48.598	Marker5063468	6.1	0.256587	23.1
Leaf index	2016		48.598	Marker2407248	5.88	0.258911	22.4
Leaf index	2016		48.598	Marker4588772	5.55	0.261528	21.7
Leaf index	2016		48.598	Marker2153559	6.27	0.273685	18
Leaf index	2016		48.974	Marker267237	10.83	0.172246	48.4
Leaf index	2016		48.974	Marker1270335	10.93	0.166919	50
Leaf index	2016		48.974	Marker2407099	7.71	0.273923	18
Leaf index	2016		48.974	Marker2352833	4.79	0.273931	17.9
Leaf index	2016		48.974	Marker4282663	7.7	0.274032	17.9
Leaf index	2016		48.974	Marker1275425	7.12	0.234777	29.7
Leaf index	2016		48.974	Marker2312668	7.09	0.235055	29.6
Leaf index	2016		48.974	Marker6182865	7.07	0.235347	29.5
Leaf index	2016		49.351	Marker4556219	7.77	0.274282	17.8
Leaf index	2016		49.351	Marker8431156	9.39	0.237907	28.7
Leaf index	2016		49.351	Marker2408332	9.69	0.237599	28.8
Leaf index	2016		49.351	Marker1275577	9.87	0.237354	28.9
Leaf index	2016		49.351	Marker1368328	10	0.237113	29
Leaf index	2016		49.351	Marker1688901	10.11	0.236864	29.1
Leaf index	2016		49.854	Marker3889169	8.32	0.239709	28.2
Leaf index	2016		49.854	Marker7012602	8.35	0.23916	28.4
Leaf index	2016		49.854	Marker3889170	8.38	0.238652	28.5
Leaf index	2016		49.854	Marker1586735	8.41	0.238172	28.7
Leaf index	2016		49.854	Marker278397	8.38	0.238652	28.5
Leaf index	2016		49.854	Marker6308314	8.35	0.23916	28.4
Leaf index	2016		49.854	Marker4950401	8.32	0.239709	28.2
Leaf index	2016		49.854	Marker6462910	8.29	0.240301	28
Leaf index	2016		50.356	Marker8053819	8.38	0.238652	28.5
Leaf index	2016		50.356	Marker1781504	8.41	0.238126	28.7
Leaf index	2016		50.356	Marker3929971	8.38	0.238602	28.5
Leaf index	2016		50.356	Marker8658060	8.35	0.239107	28.4
Leaf index	2016		50.356	Marker2184503	8.32	0.239652	28.2
Leaf index	2016		50.356	Marker2782515	8.3	0.240239	28
Leaf index	2016		50.356	Marker2051822	8.26	0.240867	27.9
Leaf index	2016		50.859	Marker7417538	7.77	0.274275	17.8
Leaf index	2016		50.859	Marker2148854	7.77	0.274274	17.8
Leaf index	2016		50.859	Marker2242215	7.77	0.274274	17.8
Leaf index	2016		50.859	Marker736802	7.77	0.274274	17.8
Leaf index	2016		51.361	Marker969875	8.29	0.240301	28
Leaf index	2016		51.361	Marker7527016	8.32	0.239709	28.2
Leaf index	2016		51.361	Marker3926658	8.35	0.23916	28.4
Leaf index	2016		57.954	Marker5797720	8.41	0.238172	28.7
Leaf index	2016		58.456	Marker4384695	8.38	0.238652	28.5
Leaf index	2016		58.959	Marker1379857	8.26	0.240867	27.9
Leaf index	2016		58.959	Marker2384611	8.3	0.240239	28
Leaf index	2016		58.959	Marker1936443	8.32	0.239652	28.2
Leaf index	2016		58.959	Marker4590506	8.35	0.239107	28.4
Leaf index	2016		58.959	Marker265195	8.38	0.238602	28.5
Leaf index	2016		59.461	Marker4830667	5.07	0.229122	31.4
Leaf index	2016		59.712	Marker6334280	6.65	0.231823	30.6
Leaf index	2016		59.964	Marker2414683	8.35	0.23916	28.4
Leaf index	2016		59.964	Marker5410507	8.32	0.239709	28.2
Leaf index	2016		59.964	Marker5172875	8.29	0.240301	28
Leaf index	2016		60.466	Marker8399447	8.29	0.240301	28
Leaf index	2016		60.466	Marker1636943	8.32	0.239709	28.2
Leaf index	2016		60.466	Marker5143646	8.35	0.23916	28.4
Leaf index	2016		60.466	Marker2781693	8.38	0.238652	28.5
Leaf index	2016		60.717	Marker4793511	6.45	0.257581	22.8
Leaf index	2016		60.717	Marker1391424	4.44	0.252101	24.5
Leaf index	2016		60.717	Marker6032382	8.68	0.225723	32.4
Leaf index	2016		60.717	Marker4050226	8.66	0.225792	32.4
Leaf index	2016		60.717	Marker1275494	8.64	0.225864	32.3
Leaf index	2016		60.717	Marker974224	8.62	0.225939	32.3
Leaf index	2016		61.222	Marker6403899	7.63	0.273685	18
Leaf index	2016		61.559	Marker4859299	11.89	0.173716	48
Leaf index	2016		61.559	Marker8450149	7.85	0.273674	18
Leaf index	2016		61.559	Marker5370150	7.85	0.273676	18
Leaf index	2016		61.559	Marker1271118	7.85	0.273676	18
Leaf index	2016		61.559	Marker4063476	7.85	0.273677	18
Leaf index	2016		61.559	Marker3283478	13.13	0.169529	49.2
Leaf index	2016		61.559	Marker1933149	13.03	0.169768	49.1
Leaf index	2016		61.755	Marker1937655	7.68	0.273685	18
Leaf index	2016		62.14	Marker5464228	8.42	0.235652	29.4
Leaf index	2016		62.404	Marker3748060	6.7	0.230827	30.9
Leaf index	2016		62.404	Marker1685068	6.72	0.230725	30.9
Leaf index	2016		62.404	Marker4872800	6.74	0.230626	30.9
Leaf index	2016		62.404	Marker5463216	4.98	0.23118	30.8
Leaf index	2016		62.404	Marker6810928	5.08	0.230987	30.8
Leaf index	2016		62.404	Marker4468997	6.16	0.230577	30.9
Leaf index	2016		62.404	Marker974410	6.14	0.230674	30.9
Leaf index	2016		62.404	Marker7312010	6.12	0.230775	30.9
Leaf index	2016		62.404	Marker3951254	6.1	0.230878	30.8
Leaf index	2016		62.404	Marker6498031	6.07	0.230985	30.8
Leaf index	2016		63.038	Marker6403898	4.48	0.298082	10.7
Leaf index	2016		63.203	Marker8094113	9.89	0.232868	30.2
Leaf index	2016		63.203	Marker1269873	9.92	0.232458	30.4
Leaf index	2016		63.203	Marker4229891	9.95	0.232057	30.5
Leaf index	2016		63.203	Marker7712586	9.98	0.231672	30.6
Leaf index	2016		63.203	Marker265188	8.36	0.231297	30.7
Leaf index	2016		63.203	Marker5087075	8.4	0.230901	30.8
Leaf index	2016		63.203	Marker1684698	7.81	0.231267	30.7
Leaf index	2016		63.203	Marker4379040	7.76	0.231642	30.6
Leaf index	2016		63.203	Marker973304	7.71	0.232034	30.5
Leaf index	2016		63.203	Marker5313737	7.66	0.232435	30.4
Leaf index	2016		63.203	Marker5085589	7.6	0.232843	30.3
Leaf index	2016		63.369	Marker1937654	7.85	0.273685	18
Leaf index	2016		63.538	Marker296008	7.65	0.273681	18
Leaf index	2016		63.538	Marker257834	7.65	0.273681	18
Leaf index	2016		63.538	Marker5093564	7.65	0.273681	18
Leaf index	2016		63.538	Marker257929	7.65	0.273681	18
Leaf index	2016		63.538	Marker1111960	7.85	0.273681	18
Leaf index	2016		63.713	Marker5565792	7.65	0.273685	18
Leaf index	2016		64.007	Marker2014207	8.04	0.228703	31.5
Leaf index	2016		64.007	Marker5084706	8.07	0.228489	31.6
Leaf index	2016		64.007	Marker8450556	8.1	0.228288	31.6
Leaf index	2016		64.007	Marker1884499	8.14	0.228098	31.7
Leaf index	2016		64.007	Marker2051593	8.86	0.227899	31.7
Leaf index	2016		65.265	Marker1270999	5.23	0.230211	31
Leaf index	2016		65.643	Marker1696600	10.24	0.166309	50.2
Leaf index	2016		65.643	Marker5822819	10.18	0.166434	50.1
Leaf index	2016		65.643	Marker5666541	10.1	0.166563	50.1
Leaf index	2016		65.643	Marker2397277	10.03	0.166694	50.1
Leaf index	2016		65.643	Marker7868812	9.96	0.166828	50
Leaf index	2016		66.02	Marker1310619	5.65	0.228392	31.6
Leaf index	2016		66.309	Marker2354065	6.49	0.229794	31.2
Leaf index	2016		66.309	Marker1702833	6.47	0.229875	31.1
Leaf index	2016		66.598	Marker6180595	6.41	0.233462	30.1
Leaf index	2016		67.482	Marker7320711	2.91	0.274275	17.8
Leaf index	2016		67.482	Marker7614075	2.91	0.274275	17.8
Leaf index	2016		72.557	Marker4769064	10.46	0.165182	50.5
Leaf index	2016		72.557	Marker5848520	10.4	0.165279	50.5
Leaf index	2016		73.823	Marker7853206	4.76	0.229965	31.1
Leaf index	2016		73.823	Marker1930232	4.78	0.229891	31.1
Leaf index	2016		73.823	Marker987719	4.8	0.229816	31.2
Leaf index	2016		73.823	Marker3926715	4.83	0.229745	31.2
Leaf index	2016		73.823	Marker1269614	3.55	0.230082	31.1
Leaf index	2017		45.967	Marker5197396	7.63	81.2958	47.3
Leaf index	2017		46.246	Marker3723218	6.89	85.2231	44.8
Leaf index	2017		46.246	Marker8024645	6.86	85.3707	44.7
Leaf index	2017		46.246	Marker2839072	6.83	85.5193	44.6
Leaf index	2017		46.246	Marker7126065	6.81	85.6724	44.5
Leaf index	2017		46.808	Marker4028292	3.53	119.278	22.7
Leaf index	2017		47.844	Marker4705389	3.62	123.44	20
Leaf index	2017		47.844	Marker6835561	3.63	123.413	20
Leaf index	2017		47.844	Marker5541524	3.28	122.603	20.6
Leaf index	2017		48.974	Marker267237	3.81	116.033	24.8
Leaf index	2017		48.974	Marker1270335	3.83	115.741	25
Leaf index	2017		60.717	Marker6032382	3.96	111.807	27.5
Leaf index	2017		60.717	Marker4050226	3.94	112.006	27.4
Leaf index	2017		60.717	Marker1275494	3.92	112.21	27.3
Leaf index	2017		60.717	Marker974224	3.9	112.419	27.2
Leaf index	2017		61.559	Marker4859299	3.79	116.662	24.4
Leaf index	2017		61.559	Marker3283478	3.26	121.491	21.3
Leaf index	2017		61.559	Marker1933149	3.22	121.942	21
Leaf index	2017		62.404	Marker5463216	3.15	122.882	20.4
Leaf index	2017		62.404	Marker6810928	3.25	122.832	20.4
Leaf index	2017		62.404	Marker4468997	4.35	122.811	20.4
Leaf index	2017		62.404	Marker974410	4.35	122.836	20.4
Leaf index	2017		62.404	Marker7312010	4.34	122.861	20.4
Leaf index	2017		62.404	Marker3951254	4.34	122.887	20.4
Leaf index	2017		62.404	Marker6498031	4.33	122.913	20.4
Leaf index	2017		63.203	Marker1684698	2.97	122.024	20.9
Leaf index	2017		63.203	Marker4379040	2.94	122.479	20.6
Leaf index	2017		63.203	Marker973304	2.9	122.943	20.3
Leaf index	2017		63.203	Marker5313737	2.86	123.417	20
Leaf index	2017		63.203	Marker5085589	2.82	123.902	19.7
Leaf index	2017		64.007	Marker2014207	3.37	118.406	23.3
Leaf index	2017		64.007	Marker5084706	3.4	118.041	23.5
Leaf index	2017		64.007	Marker8450556	3.43	117.684	23.7
Leaf index	2017		64.007	Marker1884499	3.46	117.337	24
Leaf index	2017		64.51	Marker988942	2.6	130.702	15.3
Leaf index	2017		64.51	Marker1269419	2.52	131.837	14.6
Leaf index	2017		65.265	Marker2571460	3.71	123.291	20.1
Leaf index	2017		65.265	Marker5105814	3.71	123.265	20.1
Leaf index	2017		65.265	Marker1371105	3.72	123.24	20.1
Leaf index	2017		65.265	Marker973257	5.17	122.456	20.6
Leaf index	2017		65.265	Marker1270999	3.17	124.89	19.1
Leaf index	2017		65.643	Marker1696600	2.79	128.159	17
Leaf index	2017		65.643	Marker5822819	2.77	128.308	16.9
Leaf index	2017		65.643	Marker5666541	2.76	128.462	16.8
Leaf index	2017		65.643	Marker2397277	2.74	128.622	16.7
Leaf index	2017		65.643	Marker7868812	2.73	128.789	16.5
Leaf index	2017		66.309	Marker2354065	8.37	86.7386	43.8
Leaf index	2017		66.309	Marker1702833	8.34	86.8987	43.7
Leaf index	2017		66.598	Marker6180595	6.22	110.571	28.3
Leaf index	2017		66.598	Marker2150939	6.2	110.715	28.3
Leaf index	2017		66.598	Marker973902	6.18	110.86	28.2
Leaf index	2017		68.283	Marker2413184	6.38	109.339	29.1
Leaf index	2017		68.534	Marker7526986	3.25	125.463	18.7
Leaf index	2017		69.539	Marker8280415	3.62	122.166	20.8
Leaf index	2017		72.306	Marker1740178	6.71	106.767	30.8
Leaf index	2017		72.306	Marker1216141	6.48	106.863	30.8
Leaf index	2017		72.306	Marker267229	6.47	106.949	30.7
Leaf index	2017		72.306	Marker987733	6.46	107.037	30.6
Leaf index	2017		72.557	Marker4769064	3.38	122.391	20.7
Leaf index	2017		72.557	Marker5848520	3.37	122.509	20.6
Leaf index	2017		73.823	Marker7853206	2.75	125.13	18.9
Leaf index	2017		73.823	Marker1930232	2.76	125.074	19
Leaf index	2017		73.823	Marker987719	2.77	125.018	19
Leaf index	2017		73.823	Marker3926715	2.78	124.964	19
Leaf index	2017		73.823	Marker1269614	3.17	124.858	19.1
Leaf index	2017		75.333	Marker823228	2.61	130.289	15.6
Leaf index	2017		76.338	Marker274689	6.4	109.171	29.3
Leaf index	2017		76.338	Marker7733634	6.38	109.291	29.2
Leaf index	2017		76.338	Marker5084370	6.37	109.412	29.1
Leaf index	2017		76.338	Marker1162249	6.35	109.535	29
Fruit weight	2017	6	18.737	Marker8023311	2.68	117.065	13.2
Fruit weight	2017		18.737	Marker5627003	2.68	117.074	13.2
Fruit weight	2017		19.748	Marker7604304	2.66	118.031	12.4
Fruit weight	2017		20.25	Marker99044	2.95	116.293	13.7
Fruit weight	2017		21.26	Marker8309985	3.29	114.749	14.9
Fruit weight	2017		21.26	Marker1282476	3.29	114.761	14.9
Fruit weight	2017		26.528	Marker7250222	2.5	124.726	7.5
Fruit weight	2017		26.528	Marker6255908	2.5	124.731	7.5
Fruit weight	2017		26.528	Marker6680682	2.5	124.735	7.5
Fruit weight	2017		29.898	Marker5189198	2.52	124.437	7.7
Fruit weight	2017		29.898	Marker7478625	2.52	124.436	7.7
Fruit weight	2017		30.568	Marker5130178	2.51	124.419	7.7
Fruit weight	2017		51.856	Marker2976823	2.59	124.376	7.7
Fruit weight	2017		51.856	Marker8318076	2.59	124.376	7.7
Fruit weight	2017		52.358	Marker528055	2.59	124.376	7.7
Fruit weight	2017		52.358	Marker2976820	2.59	124.376	7.7
Fruit weight	2017		52.358	Marker3715833	2.59	124.376	7.7
Fruit weight	2017		52.358	Marker1273274	2.59	124.376	7.7
Fruit weight	2017		52.61	Marker6941334	2.52	124.591	7.6
Fruit weight	2017		52.61	Marker6107047	2.52	124.601	7.6
Fruit weight	2017		54.627	Marker6785554	2.66	124.089	8
Fruit weight	2017		55.132	Marker5963019	2.7	123.9	8.1
Fruit weight	2017		55.637	Marker8369737	2.66	124.087	8
Fruit weight	2017		55.637	Marker4092011	2.66	124.091	8
Fruit weight	2017		55.637	Marker7283152	2.66	124.076	8
Fruit weight	2017		68.302	Marker4867111	2.77	118.495	12.1
Fruit weight	2017		68.302	Marker3011789	2.58	119.019	11.7
Fruit weight	2017		68.302	Marker3881498	2.58	119.037	11.7
Fruit weight	2017		68.302	Marker3440341	2.58	119.054	11.7
Fruit weight	2017		68.302	Marker1595467	2.58	119.071	11.7
Fruit weight	2017		72.712	Marker8082802	3.92	118.537	12.1
Fruit weight	2017		72.712	Marker1563668	3.96	118.765	11.9
Fruit weight	2017		72.963	Marker5984261	3.5	120.482	10.6
Fruit weight	2017		72.963	Marker5838272	3.5	120.461	10.6
Fruit weight	2017		72.963	Marker8673746	3.5	120.441	10.7
Fruit weight	2017		72.963	Marker3710550	3.5	120.42	10.7
Fruit weight	2017		73.214	Marker804396	3.52	119.884	11.1
Fruit weight	2017		75.488	Marker7631791	2.86	121.739	9.7
Fruit weight	2017		75.993	Marker3577270	2.69	122.838	8.9
Fruit weight	2017		75.993	Marker3946420	2.7	122.841	8.9
Fruit weight	2017		75.993	Marker1346093	2.7	122.851	8.9
Fruit weight	2017		75.993	Marker7362789	2.7	122.861	8.9
Fruit weight	2017		77.276	Marker2371461	3.48	120.984	10.3
Fruit weight	2017		77.276	Marker649926	3.48	120.984	10.3
Fruit weight	2017		77.276	Marker5224154	3.48	120.984	10.3
Fruit weight	2017		77.276	Marker1563671	3.48	120.984	10.3
Fruit weight	2017		77.276	Marker7681175	3.48	120.965	10.3
Fruit weight	2017		77.276	Marker8122742	3.48	120.945	10.3
Fruit weight	2017		77.276	Marker6421815	3.48	120.926	10.3
Fruit weight	2017		77.276	Marker3164230	3.48	120.906	10.3
Fruit weight	2017		77.276	Marker5984258	3.48	120.984	10.3
Fruit weight	2017		77.276	Marker6150257	3.48	120.886	10.3
Fruit weight	2017		77.276	Marker8005922	3.48	120.906	10.3
Fruit weight	2017		77.276	Marker5650189	3.48	120.926	10.3
Fruit weight	2017		77.276	Marker8275213	3.48	120.945	10.3
Fruit weight	2017		77.276	Marker105036	3.48	120.965	10.3
Fruit weight	2017		77.276	Marker7604295	3.48	120.984	10.3
Fruit weight	2017		77.276	Marker309267	3.48	120.984	10.3
Fruit weight	2017		77.276	Marker4907862	3.48	120.984	10.3
Fruit weight	2017		77.276	Marker5984112	3.48	120.984	10.3
Fruit weight	2017		77.276	Marker6003574	3.47	121.003	10.2
Fruit weight	2017		77.59	Marker3906244	3.09	122.069	9.5
Fruit weight	2017		77.59	Marker6063632	3.09	122.055	9.5
Fruit weight	2017		77.59	Marker5837835	3.09	122.041	9.5
Fruit weight	2017		77.59	Marker5273673	3.1	122.028	9.5
Fruit weight	2017		77.904	Marker5946656	3.14	121.474	9.9
Fruit weight	2017		77.904	Marker4282660	2.55	123.778	8.2
Fruit weight	2017		77.904	Marker2383069	2.55	123.786	8.2
Fruit weight	2017		77.904	Marker6780502	2.55	123.799	8.2
Fruit weight	2017		77.904	Marker5211576	2.55	123.813	8.2
Fruit weight	2017		77.904	Marker5266334	2.55	123.826	8.1
Fruit weight	2017		78.535	Marker3316208	2.93	123.076	8.7
Fruit weight	2017		78.535	Marker4716896	2.93	123.075	8.7
Fruit weight	2017		79.04	Marker1255600	2.94	123.008	8.8
Fruit weight	2017		79.04	Marker99054	2.94	123.008	8.8
Fruit weight	2017		79.04	Marker7547063	2.94	123.008	8.8
Fruit weight	2017		79.04	Marker5273347	2.94	123.008	8.8
Fruit weight	2017		79.04	Marker5660269	2.94	123.008	8.8
Fruit weight	2017		79.545	Marker3946857	2.93	123.076	8.7
Fruit weight	2017		79.545	Marker4716893	2.92	123.086	8.7
Fruit weight	2017		80.086	Marker2627994	2.55	123.944	8.1
Fruit weight	2017		80.086	Marker1256474	2.55	123.931	8.1
Fruit weight	2017		80.086	Marker5534154	2.55	123.918	8.1
Fruit weight	2017		80.086	Marker6656860	2.55	123.905	8.1
Fruit weight	2017		80.086	Marker8576124	2.55	123.892	8.1
Fruit weight	2017		81.708	Marker3440340	3.07	120.695	10.5
Fruit weight	2017		81.708	Marker3242481	3.07	120.708	10.5
Fruit weight	2017		81.708	Marker5314382	3.07	120.72	10.5
Fruit weight	2017		82.249	Marker2628167	3.05	120.374	10.7
Fruit weight	2017		82.249	Marker5984351	3.05	120.401	10.7
Fruit weight	2017		82.249	Marker8006114	3.05	120.428	10.7
Fruit weight	2017		83.342	Marker72217	2.54	124.567	7.6
Fruit weight	2017		83.342	Marker4716894	2.53	124.592	7.6
Fruit weight	2017		83.342	Marker6712503	2.53	124.618	7.6
Fruit weight	2017		83.342	Marker7987054	2.53	124.618	7.6
Fruit weight	2017		83.342	Marker6025177	2.53	124.618	7.6
Fruit weight	2017		83.342	Marker6120759	2.53	124.618	7.6
Fruit weight	2017		83.342	Marker7923358	2.53	124.618	7.6
Fruit weight	2017		84.355	Marker5702184	2.87	123.287	8.5
Fruit weight	2017		84.355	Marker5702183	2.87	123.287	8.5
Fruit weight	2017		84.355	Marker3820449	2.87	123.287	8.5
Fruit weight	2017		84.967	Marker3881495	3.04	122.259	9.3
Fruit weight	2017		84.967	Marker6002927	3.04	122.247	9.3
Fruit weight	2017		85.578	Marker5273176	3.16	121.688	9.7
Fruit weight	2017		87.433	Marker1810487	2.8	123.557	8.3
Fruit weight	2017		87.433	Marker1988407	2.8	123.557	8.3
Fruit weight	2017		87.433	Marker393629	2.8	123.557	8.3
Fruit weight	2017		87.433	Marker7361414	2.8	123.557	8.3
Fruit weight	2017		87.433	Marker6049298	2.8	123.557	8.3
Fruit weight	2017		87.433	Marker3227148	2.8	123.557	8.3
Fruit weight	2017		87.433	Marker5973763	2.8	123.557	8.3
Fruit weight	2017		87.433	Marker6940516	2.8	123.556	8.3
Fruit weight	2017		87.684	Marker7188053	2.99	122.841	8.9
Fruit weight	2017		87.684	Marker7604325	2.99	122.841	8.9
Fruit weight	2017		87.935	Marker8176800	2.87	123.287	8.5
Fruit weight	2017		87.935	Marker4454837	2.87	123.304	8.5
Fruit weight	2017		87.935	Marker587645	2.87	123.264	8.6
Fruit weight	2017		88.741	Marker8564969	2.94	121.663	9.8
Fruit weight	2017		89.007	Marker7155188	2.95	121.18	10.1
Fruit weight	2017		89.007	Marker6391861	2.95	121.158	10.1
Fruit weight	2017		89.007	Marker6063524	2.95	121.136	10.1
Fruit weight	2017		89.007	Marker3715976	2.95	121.114	10.2
Fruit weight	2017		91.408	Marker2154108	3.01	121.542	9.8
Fruit weight	2017		91.673	Marker6022756	3.01	121.85	9.6
Fruit weight	2017		91.673	Marker5984259	3.01	121.862	9.6
Fruit weight	2017		97.1	Marker8144636	2.87	123.293	8.5
Fruit weight	2017		97.1	Marker4839145	2.87	123.304	8.5
Fruit weight	2017		97.1	Marker2878306	2.87	123.304	8.5
Fruit weight	2017		97.1	Marker3205233	2.87	123.304	8.5
Fruit weight	2017		97.1	Marker6941363	2.87	123.304	8.5
Fruit weight	2017		97.1	Marker8646658	2.87	123.304	8.5
Fruit weight	2017		97.1	Marker391190	2.87	123.293	8.5
Fruit weight	2017		97.603	Marker1885544	2.99	122.837	8.9
Fruit weight	2017		97.603	Marker6941361	2.99	122.837	8.9
Fruit weight	2017		97.603	Marker7440199	2.99	122.836	8.9
Fruit weight	2017		97.603	Marker397778	2.99	122.836	8.9
Fruit weight	2017		97.603	Marker4002351	2.83	123.424	8.4
Fruit weight	2017		97.879	Marker8163426	3.01	122.318	9.3
Fruit weight	2017		97.879	Marker6941464	3.01	122.3	9.3
Fruit weight	2017		98.155	Marker4628457	3.04	121.744	9.7
Fruit weight	2017		98.155	Marker2933006	3.04	121.724	9.7
Fruit weight	2017		98.155	Marker4859719	2.84	122.596	9.1
Fruit weight	2017		98.431	Marker5905844	2.91	120.22	10.8
Fruit weight	2017		98.431	Marker6165097	2.91	120.239	10.8
Fruit weight	2017		98.431	Marker4860661	2.91	120.257	10.8
Fruit weight	2017		98.431	Marker1635035	2.91	120.276	10.8
Fruit weight	2017		98.707	Marker2592225	3.12	119.261	11.5
Fruit weight	2017		98.707	Marker7835208	3.12	119.285	11.5
Fruit weight	2017		100.406	Marker7840557	2.8	123.555	8.3
Fruit weight	2017		100.406	Marker557270	2.8	123.56	8.3
Fruit weight	2017		100.406	Marker594692	2.8	123.563	8.3
Fruit weight	2017		100.406	Marker6941366	2.8	123.565	8.3
Fruit weight	2017		101.872	Marker7767858	2.75	122.067	9.5
Fruit weight	2017		101.872	Marker4451016	2.75	122.053	9.5
Fruit weight	2017		101.872	Marker6827428	2.75	122.039	9.5
Fruit weight	2017		101.872	Marker8192612	2.75	122.024	9.5
Fruit weight	2017		101.872	Marker4304040	2.75	122.01	9.5
Fruit weight	2017		113.519	Marker7302035	2.56	123.998	8
Fruit weight	2017		114.002	Marker8310479	2.56	124.429	7.7
Fruit weight	2017		114.002	Marker1933119	2.56	124.44	7.7
Fruit weight	2017		114.002	Marker1155531	2.56	124.45	7.7
Fruit weight	2017		114.002	Marker3753627	2.56	124.461	7.7
Fruit weight	2017		114.002	Marker8097769	2.56	124.471	7.7
Fruit weight	2017		114.002	Marker7584208	2.56	124.482	7.7
Fruit weight	2017		114.002	Marker593457	2.56	124.477	7.7
Fruit weight	2017		114.002	Marker8249648	2.56	124.471	7.7
Fruit weight	2017		114.002	Marker6941348	2.57	124.466	7.7
Fruit weight	2017		114.002	Marker8249669	2.57	124.461	7.7
Fruit weight	2017		114.608	Marker8399054	2.66	123.453	8.4
Fruit weight	2017		114.608	Marker3673729	2.66	123.44	8.4
Fruit weight	2017		114.608	Marker7131442	2.67	123.428	8.4
Fruit weight	2017		114.608	Marker7934829	2.67	123.415	8.5
Fruit weight	2017		115.511	Marker129934	2.5	124.625	7.6
Fruit weight	2017		115.511	Marker592963	2.5	124.607	7.6
Fruit weight	2017		115.511	Marker8249267	2.51	124.59	7.6
Fruit weight	2017		115.511	Marker129933	2.51	124.573	7.6
Fruit weight	2017		115.82	Marker1641973	2.65	123.812	8.2
Fruit weight	2017		115.82	Marker6419487	2.65	123.8	8.2
Fruit weight	2017		115.82	Marker8181902	2.65	123.788	8.2
Fruit weight	2017		115.82	Marker8699892	2.65	123.776	8.2
Fruit weight	2017		115.82	Marker4476279	2.64	124.175	7.9
Fruit weight	2017		115.82	Marker2255717	2.69	122.66	9
Fruit weight	2017		115.82	Marker4198469	2.69	122.673	9
Fruit weight	2017		116.122	Marker3524382	2.69	122.984	8.8
Fruit weight	2017		116.423	Marker529004	2.58	123.824	8.1
Fruit weight	2017		116.423	Marker2700059	2.58	123.836	8.1
Fruit weight	2017		117.02	Marker593458	2.53	124.603	7.6
Fruit weight	2017		117.02	Marker594817	2.53	124.605	7.6
Fruit weight	2017		117.029	Marker8460199	2.53	124.598	7.6
Fruit weight	2017		117.029	Marker648890	2.53	124.588	7.6
Fruit weight	2017		117.029	Marker2592226	2.53	124.578	7.6
Fruit weight	2017		117.331	Marker2627323	2.54	124.267	7.8
Fruit weight	2017		117.331	Marker5661466	2.54	124.257	7.8
Fruit weight	2016	10	38.653	Marker3471464	2.72	0.0283235	15.7
Fruit weight	2016		79.131	Marker1374272	3.23	0.0296793	11.6
Fruit weight	2016		79.131	Marker3930544	3.28	0.0295738	11.9
Fruit weight	2016		79.131	Marker4244491	3.28	0.0295754	11.9
Fruit weight	2016		79.131	Marker8176432	3.28	0.029577	11.9
Fruit weight	2016		102.555	Marker299636	2.65	0.0306198	8.8
Fruit weight	2017		0	Marker2057316	7.5	35.5607	73.6
Fruit weight	2017		1.523	Marker2634088	6.51	35.9085	73.4
Fruit weight	2017		37.344	Marker766355	5.87	50.4869	62.5
Fruit weight	2017		38.653	Marker3471464	4.37	55.0239	59.2
Fruit weight	2016	12	35.331	Marker2041758	3.4	0.0288376	14.1
Fruit weight	2016		35.331	Marker2414713	3.4	0.0288394	14.1
Fruit weight	2016		35.331	Marker5257039	3.4	0.0288413	14.1
Fruit weight	2016		35.331	Marker3919575	3.4	0.0288431	14.1
Fruit weight	2016		35.331	Marker7454452	3.4	0.0288449	14.1
Fruit weight	2016		35.331	Marker2585146	3.4	0.0288467	14.1
Fruit weight	2016		41.865	Marker3075951	3.31	0.029917	10.9
Fruit weight	2016		41.865	Marker3878656	3.31	0.0299171	10.9
Fruit weight	2016		41.865	Marker2350641	3.31	0.0299171	10.9
Fruit weight	2016		41.865	Marker8227111	3.31	0.0299172	10.9
Fruit weight	2016		41.865	Marker6355356	3.31	0.0299173	10.9
Fruit weight	2016		41.865	Marker4758694	3.31	0.0299173	10.9
Fruit weight	2016		41.865	Marker8659660	3.31	0.0299159	10.9
Fruit weight	2016		41.865	Marker1889264	3.31	0.0299145	10.9
Fruit weight	2016		41.865	Marker8685476	3.31	0.0299131	10.9
Fruit weight	2016		41.865	Marker1083538	3.31	0.0299116	10.9
Fruit weight	2016		41.865	Marker4348910	3.31	0.0299097	10.9
Fruit weight	2016		41.865	Marker5059545	3.31	0.0299088	10.9
Fruit weight	2016		41.865	Marker1850440	3.31	0.0299102	10.9
Fruit weight	2016		41.865	Marker2308509	3.31	0.0299116	10.9
Fruit weight	2016		41.865	Marker5588165	3.31	0.0299131	10.9
Fruit weight	2016		41.865	Marker4691610	3.31	0.0299145	10.9
Fruit weight	2016		41.865	Marker1939055	3.31	0.0299159	10.9
Fruit weight	2016		41.865	Marker1928865	3.31	0.0299173	10.9
Fruit weight	2016		41.865	Marker4300477	3.31	0.0299159	10.9
Fruit weight	2016		41.865	Marker5854489	3.31	0.0299145	10.9
Fruit weight	2016		41.865	Marker743992	3.31	0.0299173	10.9
Fruit weight	2016		41.865	Marker2585144	3.31	0.0299173	10.9
Fruit weight	2016		41.865	Marker8292590	3.31	0.0299173	10.9
Fruit weight	2016		41.865	Marker3786887	3.31	0.0299131	10.9
Fruit weight	2016		41.865	Marker2308593	3.31	0.0299145	10.9
Fruit weight	2016		41.865	Marker7499040	3.31	0.0299159	10.9
Fruit weight	2016		41.865	Marker3615994	3.31	0.0299173	10.9
Fruit weight	2016		41.865	Marker5586461	3.31	0.0299159	10.9
Fruit weight	2016		41.865	Marker2309260	3.31	0.0299145	10.9
Fruit weight	2016		41.865	Marker749097	3.31	0.0299131	10.9
Fruit weight	2016		41.865	Marker7831451	3.31	0.0299116	10.9
Fruit weight	2016		41.865	Marker5052227	3.31	0.0299102	10.9
Fruit weight	2016		41.865	Marker5586840	3.31	0.0299088	10.9
Fruit weight	2016		41.865	Marker5855912	3.31	0.0299102	10.9
Fruit weight	2016		41.865	Marker1201064	3.31	0.0299116	10.9
Fruit weight	2016		41.865	Marker2978992	3.31	0.0299131	10.9
Fruit weight	2016		41.865	Marker2308965	3.31	0.0299145	10.9
Fruit weight	2016		41.865	Marker8182045	3.31	0.0299159	10.9
Fruit weight	2016		41.865	Marker8197729	3.31	0.0299173	10.9
Fruit weight	2016		41.865	Marker8220474	3.31	0.0299159	10.9
Fruit weight	2016		41.865	Marker7706136	3.31	0.0299145	10.9
Fruit weight	2016		41.865	Marker743993	3.31	0.0299131	10.9
Fruit weight	2016		41.865	Marker4195045	3.31	0.0299116	10.9
Fruit weight	2016		41.865	Marker5532780	3.31	0.0299102	10.9
Fruit weight	2016		41.865	Marker7173671	3.31	0.0299088	10.9
Fruit weight	2016		41.865	Marker4674412	3.31	0.0299102	10.9
Fruit weight	2016		41.865	Marker3279979	3.31	0.0299116	10.9
Fruit weight	2016		41.865	Marker5545043	3.31	0.0299131	10.9
Fruit weight	2016		41.865	Marker1083828	3.31	0.0299145	10.9
Fruit weight	2016		41.865	Marker1710498	3.31	0.0299159	10.9
Fruit weight	2016		41.865	Marker1346076	3.31	0.0299173	10.9
Fruit weight	2016		41.865	Marker5743144	3.31	0.0299159	10.9
Fruit weight	2016		41.865	Marker6971347	3.31	0.0299145	10.9
Fruit weight	2016		41.865	Marker5191468	3.31	0.0299131	10.9
Fruit weight	2016		41.865	Marker5043414	3.31	0.0299116	10.9
Fruit weight	2016		41.865	Marker4343771	3.31	0.0299102	10.9
Fruit weight	2016		41.865	Marker1939127	3.33	0.0296803	11.6
Fruit weight	2016		41.865	Marker494533	3.33	0.0296818	11.6
Fruit weight	2016		41.865	Marker5854371	3.33	0.0296833	11.6
Fruit weight	2016		41.865	Marker6581977	3.33	0.0296849	11.6
Fruit weight	2016		41.865	Marker5258024	3.33	0.0296864	11.6
Fruit weight	2016		41.865	Marker8287554	3.33	0.0296879	11.6
Fruit weight	2016		43.419	Marker98971	3.33	0.0297515	11.4
Fruit weight	2016		44.972	Marker5946644	3.35	0.0295711	11.9
Fruit weight	2016		44.972	Marker2350646	3.35	0.0295698	11.9
Fruit weight	2016		44.972	Marker5984268	3.35	0.0295686	11.9
Fruit weight	2016		44.972	Marker1679689	3.35	0.0295674	11.9
Fruit weight	2016		44.972	Marker6355357	3.22	0.0299191	10.9
Fruit weight	2016		44.972	Marker8095344	3.22	0.0299201	10.9
Fruit weight	2016		44.972	Marker8095345	3.22	0.0299212	10.9
Fruit weight	2016		44.972	Marker3878654	3.22	0.0299222	10.9
Fruit weight	2016		44.972	Marker8691551	3.22	0.0299232	10.9
Fruit weight	2016		44.972	Marker8438582	3.22	0.0299242	10.9
Fruit weight	2016		46.018	Marker3238739	3.2	0.0300269	10.6
Fruit weight	2016		46.018	Marker6230073	3.2	0.0300269	10.6
Fruit weight	2016		46.018	Marker1654555	3.2	0.0300269	10.6
Fruit weight	2016		46.018	Marker1690356	3.2	0.0300269	10.6
Fruit weight	2016		46.018	Marker3238741	3.2	0.0300269	10.6
Fruit weight	2016		46.525	Marker8197730	3.26	0.0299342	10.9
Fruit weight	2016		47.864	Marker6109824	3.33	0.0297196	11.5
Fruit weight	2016		47.864	Marker8556738	3.33	0.0297181	11.5
Fruit weight	2016		50.028	Marker3747611	3.36	0.0293753	12.5
Fruit weight	2016		50.028	Marker995395	3.36	0.0293736	12.5
Fruit weight	2016		50.028	Marker668366	3.36	0.029372	12.5
Fruit weight	2016		51.233	Marker5854041	3.29	0.0299293	10.9
Fruit weight	2016		51.233	Marker4349013	3.29	0.0299312	10.9
Fruit weight	2016		51.233	Marker1939093	3.29	0.0299326	10.9
Fruit weight	2016		51.233	Marker3952625	3.29	0.029934	10.9
Fruit weight	2016		51.233	Marker8011894	3.29	0.0299354	10.9
Fruit weight	2016		51.233	Marker6802978	3.29	0.0299368	10.8
Fruit weight	2016		51.233	Marker7872796	3.29	0.0299382	10.8
Fruit weight	2016		51.233	Marker5545418	3.29	0.0299382	10.8
Fruit weight	2016		51.233	Marker6260869	3.29	0.0299382	10.8
Fruit weight	2016		51.233	Marker2627787	3.29	0.0299382	10.8
Fruit weight	2016		51.233	Marker1304100	3.29	0.0299382	10.8
Fruit weight	2016		51.233	Marker2024730	3.29	0.0299382	10.8
Fruit weight	2016		51.233	Marker6677457	3.29	0.0299368	10.8
Fruit weight	2016		51.233	Marker2262296	3.29	0.0299354	10.9
Fruit weight	2016		51.233	Marker2041757	3.29	0.029934	10.9
Fruit weight	2016		51.233	Marker7171852	3.29	0.0299326	10.9
Fruit weight	2016		51.233	Marker490276	3.29	0.0299312	10.9
Fruit weight	2016		51.233	Marker7455279	3.29	0.0299297	10.9
Fruit weight	2016		51.233	Marker7946137	3.29	0.0299312	10.9
Fruit weight	2016		51.233	Marker1243706	3.29	0.0299326	10.9
Fruit weight	2016		51.233	Marker5257037	3.29	0.029934	10.9
Fruit weight	2016		51.233	Marker1002224	3.29	0.0299354	10.9
Fruit weight	2016		51.233	Marker7884235	3.29	0.0299368	10.8
Fruit weight	2016		51.233	Marker529054	3.29	0.0299382	10.8
Fruit weight	2016		51.233	Marker8248929	3.29	0.0299382	10.8
Fruit weight	2016		51.233	Marker7031975	3.29	0.0299382	10.8
Fruit weight	2016		51.233	Marker7779407	3.29	0.0299368	10.8
Fruit weight	2016		51.233	Marker4689088	3.29	0.0299354	10.9
Fruit weight	2016		51.233	Marker5257749	3.29	0.029934	10.9
Fruit weight	2016		51.233	Marker3919576	3.29	0.0299326	10.9
Fruit weight	2016		51.233	Marker5258954	3.29	0.0299312	10.9
Fruit weight	2016		51.233	Marker6603765	3.29	0.0299297	10.9
Fruit weight	2016		51.233	Marker6971918	3.29	0.0299312	10.9
Fruit weight	2016		51.233	Marker4755815	3.29	0.0299326	10.9
Fruit weight	2016		51.233	Marker5121915	3.29	0.029934	10.9
Fruit weight	2016		51.233	Marker8549103	3.29	0.0299354	10.9
Fruit weight	2016		51.233	Marker4604601	3.29	0.0299368	10.8
Fruit weight	2016		51.233	Marker7405384	3.29	0.0299382	10.8
Fruit weight	2016		51.233	Marker4672452	3.29	0.0299382	10.8
Fruit weight	2016		51.233	Marker3948744	3.29	0.0299382	10.8
Fruit weight	2016		51.233	Marker3222384	3.29	0.0299368	10.8
Fruit weight	2016		51.233	Marker7871550	3.29	0.0299354	10.9
Fruit weight	2016		51.233	Marker4755529	3.29	0.029934	10.9
Fruit weight	2016		51.233	Marker7431860	3.29	0.0299326	10.9
Fruit weight	2016		51.233	Marker4341644	3.29	0.0299307	10.9
Fruit longitude	2018	1	116.137	Marker7566538	2.6	7.8951	6.7
Fruit longitude	2018		116.137	Marker4647570	2.6	7.89521	6.7
Fruit longitude	2018		119.148	Marker8283547	2.66	7.91453	6.5
Fruit longitude	2018		119.148	Marker7384533	2.66	7.91463	6.5
Fruit longitude	2018		119.148	Marker8309399	2.66	7.91472	6.5
Fruit longitude	2018		119.3	Marker2831777	2.66	7.91357	6.5
Fruit longitude	2018		119.3	Marker5167850	2.66	7.9134	6.5
Fruit longitude	2018		119.3	Marker7982292	2.66	7.91323	6.5
Fruit longitude	2018		119.3	Marker1651959	2.66	7.91306	6.5
Fruit longitude	2018		119.3	Marker4974860	2.66	7.91288	6.5
Fruit longitude	2018		119.3	Marker8148618	2.65	7.90636	6.6
Fruit longitude	2018		119.3	Marker1963892	2.55	7.92945	6.3
Fruit longitude	2018		119.3	Marker1963917	2.64	7.91181	6.5
Fruit longitude	2018		119.3	Marker1963898	2.64	7.91198	6.5
Fruit longitude	2018		119.3	Marker2321664	2.64	7.91216	6.5
Fruit longitude	2018		119.3	Marker8318144	2.64	7.91233	6.5
Fruit longitude	2018		119.738	Marker3110137	2.62	7.92149	6.4
Fruit longitude	2018		119.738	Marker8460319	2.53	7.94085	6.2
Fruit longitude	2018		119.989	Marker3250530	2.55	7.93789	6.2
Fruit longitude	2018		119.989	Marker8591561	2.55	7.93789	6.2
Fruit longitude	2018		119.989	Marker3935773	2.55	7.93703	6.2
Fruit longitude	2018		119.989	Marker1963907	2.56	7.93617	6.2
Fruit longitude	2018		119.989	Marker5027261	2.56	7.93532	6.2
Fruit longitude	2018		119.989	Marker5437298	2.56	7.93448	6.3
Fruit longitude	2018		120.24	Marker1636064	2.66	7.91378	6.5
Fruit longitude	2018		120.24	Marker3881532	2.66	7.91368	6.5
Fruit longitude	2018		120.745	Marker4249425	2.65	7.91071	6.5
Fruit longitude	2018		126.553	Marker6115070	2.64	7.91916	6.4
Fruit longitude	2018		126.553	Marker4063477	2.64	7.91916	6.4
Fruit longitude	2018		126.553	Marker6104413	2.64	7.91916	6.4
Fruit longitude	2018		126.553	Marker5437300	2.64	7.91916	6.4
Fruit longitude	2018		126.553	Marker8387647	2.64	7.91916	6.4
Fruit longitude	2018		126.553	Marker4249426	2.64	7.91916	6.4
Fruit longitude	2018		126.553	Marker4249427	2.64	7.91916	6.4
Fruit longitude	2018		126.553	Marker2321663	2.64	7.91903	6.4
Fruit longitude	2018		126.553	Marker1963897	2.64	7.9189	6.4
Fruit longitude	2018		126.553	Marker8337071	2.64	7.91877	6.4
Fruit longitude	2018		126.553	Marker8297305	2.64	7.91864	6.4
Fruit longitude	2018		126.553	Marker3287936	2.64	7.9185	6.4
Fruit longitude	2018		126.553	Marker1963904	2.59	7.87471	7
Fruit longitude	2018		126.553	Marker1963902	2.59	7.87487	7
Fruit longitude	2018		126.553	Marker1963901	2.59	7.87504	7
Fruit longitude	2018		126.553	Marker2831754	2.59	7.87521	7
Fruit longitude	2018		126.553	Marker1963906	2.59	7.87537	7
Fruit longitude	2018		126.553	Marker1963894	2.59	7.87554	6.9
Fruit longitude	2018		130.181	Marker4249424	2.58	7.90227	6.6
Fruit longitude	2018		130.181	Marker616590	2.58	7.90219	6.6
Fruit longitude	2018		130.181	Marker3682573	2.58	7.90211	6.6
Fruit longitude	2018		130.181	Marker5701933	2.58	7.90202	6.6
Fruit longitude	2018		130.181	Marker4821039	2.58	7.90194	6.6
Fruit longitude	2018	5	62.246	Marker8508735	2.63	7.4484	12
Fruit longitude	2018		62.246	Marker377217	2.63	7.44866	12
Fruit longitude	2018		91.886	Marker4199205	2.63	7.92103	6.4
Fruit longitude	2018		91.929	Marker65509	2.63	7.9217	6.4
Fruit longitude	2018		91.929	Marker1254084	2.63	7.92179	6.4
Fruit longitude	2018		91.929	Marker65511	2.63	7.92188	6.4
Fruit longitude	2018		144.753	Marker4096621	2.7	7.86579	7.1
Fruit longitude	2016	7	121.832	Marker7887467	2.51	5.41693	8.6
Fruit longitude	2016		147.012	Marker7932888	2.6	5.36619	9.4
Fruit longitude	2016		147.012	Marker8569027	2.65	5.35216	9.6
Fruit longitude	2016	9	38.881	Marker1796031	2.55	5.41013	8.7
Fruit longitude	2016		38.881	Marker5838082	2.55	5.4102	8.7
Fruit longitude	2016		38.881	Marker5117720	2.55	5.41027	8.7
Fruit longitude	2016		38.881	Marker3916279	2.55	5.41034	8.7
Fruit longitude	2016		38.881	Marker8527857	2.55	5.41041	8.7
Fruit longitude	2016		38.881	Marker1485739	2.55	5.41047	8.7
Fruit longitude	2016		55.683	Marker5273676	2.6	5.40902	8.7
Fruit longitude	2016		55.683	Marker5969387	2.6	5.40906	8.7
Fruit longitude	2016		55.683	Marker8361423	2.6	5.4091	8.7
Fruit longitude	2016		55.683	Marker7414361	2.6	5.40915	8.7
Fruit longitude	2016		55.683	Marker5273674	2.6	5.40915	8.7
Fruit longitude	2016		55.683	Marker5241796	2.6	5.40915	8.7
Fruit longitude	2016		55.683	Marker6847544	2.6	5.40915	8.7
Fruit longitude	2016		55.683	Marker2002913	2.6	5.40944	8.7
Fruit longitude	2016		55.683	Marker7749791	2.6	5.40973	8.7
Fruit longitude	2016		55.949	Marker3203007	2.55	5.41836	8.5
Fruit longitude	2016		60.355	Marker1852965	2.52	5.42526	8.4
Fruit longitude	2016		60.355	Marker1667156	2.57	5.41501	8.6
Fruit longitude	2016		60.876	Marker2382836	2.56	5.41737	8.5
Fruit longitude	2016		60.876	Marker6025023	2.56	5.41755	8.5
Fruit longitude	2016		60.876	Marker3839672	2.56	5.41774	8.5
Fruit longitude	2016		60.876	Marker7030382	2.56	5.41793	8.5
Fruit longitude	2016		60.876	Marker3107399	2.55	5.41833	8.5
Fruit longitude	2016		61.109	Marker1248821	2.53	5.42251	8.5
Fruit longitude	2016	10	79.131	Marker3930544	2.7	5.11794	13.6
Fruit longitude	2016		79.131	Marker4244491	2.7	5.11951	13.6
Fruit longitude	2016		79.131	Marker8176432	2.7	5.12108	13.5
Fruit longitude	2017		37.344	Marker766355	5.98	57.9206	58.1
Fruit longitude	2018		79.131	Marker1374272	2.68	7.83196	7.5
Fruit longitude	2018		79.131	Marker3930544	2.63	7.84712	7.3
Fruit longitude	2018		79.131	Marker4244491	2.63	7.84731	7.3
Fruit longitude	2018		79.131	Marker8176432	2.63	7.84751	7.3
Fruit longitude	2018	11	149.624	Marker565925	2.87	7.82113	7.6
Fruit longitude	2018		149.624	Marker3770005	2.87	7.82124	7.6
Fruit longitude	2018		149.624	Marker8185509	2.87	7.82135	7.6
Fruit longitude	2018		150.298	Marker1273615	2.57	7.9009	6.6
Fruit longitude	2018		150.298	Marker5495870	2.57	7.90104	6.6
Fruit longitude	2018		151.657	Marker6207986	2.6	7.92726	6.3
Fruit longitude	2016	12	77.797	Marker5969912	2.93	4.81441	18.7
Fruit longitude	2016		77.797	Marker1084725	2.94	4.84517	18.2
Fruit longitude	2016		77.797	Marker6582102	2.94	4.8464	18.2
Fruit longitude	2016		77.797	Marker5527484	2.94	4.84763	18.2
Fruit longitude	2016		77.797	Marker750379	2.94	4.84885	18.1
Fruit longitude	2016		77.797	Marker5258995	2.94	4.85008	18.1
Fruit longitude	2017		77.797	Marker5969912	3.28	87.2188	36.9
Fruit longitude	2017		77.797	Marker1084725	2.98	87.2897	36.8
Fruit longitude	2017		77.797	Marker6582102	2.97	87.3057	36.8
Fruit longitude	2017		77.797	Marker5527484	2.96	87.3218	36.8
Fruit longitude	2017		77.797	Marker750379	2.95	87.3381	36.8
Fruit longitude	2017		77.797	Marker5258995	2.95	87.3532	36.8
Fruit diameter	2018	4	130.785	Marker3389486	3.1	1.60524	10
Fruit diameter	2018		130.785	Marker4009502	6.93	1.34146	24.8
Fruit diameter	2018		130.785	Marker3389506	6.93	1.34148	24.8
Fruit diameter	2018		131.559	Marker4009711	2.91	1.62621	8.9
Fruit diameter	2018		131.559	Marker3435371	2.91	1.62627	8.8
Fruit diameter	2018		138.543	Marker2686883	2.73	1.63356	8.4
Fruit diameter	2018		138.866	Marker2690566	7.02	1.34632	24.5
Fruit diameter	2018		139.19	Marker2690195	4.02	1.57231	11.9
Fruit diameter	2018		139.19	Marker4938868	4.02	1.57308	11.8
Fruit diameter	2018		139.19	Marker3389507	4.02	1.57381	11.8
Fruit diameter	2018		139.19	Marker4014058	4.02	1.57448	11.8
Fruit diameter	2018		139.19	Marker4939002	4.01	1.57474	11.7
Fruit diameter	2018		139.19	Marker4790253	4	1.57501	11.7
Fruit diameter	2018		139.19	Marker1519364	3.99	1.57529	11.7
Fruit diameter	2018		139.19	Marker1519366	3.98	1.57558	11.7
Fruit diameter	2018		139.718	Marker2915315	3.28	1.61424	9.5
Fruit diameter	2018		139.983	Marker7952685	3.2	1.6176	9.3
Fruit diameter	2018		139.983	Marker2688445	3.2	1.61756	9.3
Fruit diameter	2018		140.256	Marker6167280	2.51	1.65548	7.2
Fruit diameter	2018	9	16.354	Marker5401998	2.66	1.66844	6.5
Fruit diameter	2018		16.354	Marker6084980	2.66	1.66835	6.5
Fruit diameter	2018		16.354	Marker8431900	2.67	1.66827	6.5
Fruit diameter	2018		16.354	Marker5136352	2.67	1.66819	6.5
Fruit diameter	2018		16.354	Marker6667138	2.68	1.66793	6.5
Fruit diameter	2018		16.354	Marker286902	2.68	1.66796	6.5
Fruit diameter	2018		16.359	Marker8310490	2.68	1.66797	6.5
Fruit diameter	2018		16.359	Marker4458370	2.68	1.66795	6.5
Fruit diameter	2018		16.862	Marker5505691	2.52	1.67455	6.1
Fruit diameter	2018		16.862	Marker5505690	2.54	1.67261	6.3
Fruit diameter	2018		16.862	Marker5166878	2.54	1.67263	6.3
Fruit diameter	2018		16.862	Marker893142	2.54	1.67265	6.2
Fruit diameter	2018		16.862	Marker348632	2.54	1.67267	6.2
Fruit diameter	2018		16.862	Marker8197023	2.54	1.67268	6.2
Fruit diameter	2018		17.364	Marker3707102	2.73	1.66562	6.6
Fruit diameter	2018		17.364	Marker1519547	2.73	1.66551	6.6
Fruit diameter	2018		17.364	Marker6639411	2.73	1.66551	6.6
Fruit diameter	2018		17.364	Marker2386394	2.73	1.66551	6.6
Fruit diameter	2018		17.616	Marker5038360	2.61	1.67071	6.4
Fruit diameter	2018		17.867	Marker8197022	2.51	1.67493	6.1
Fruit diameter	2018		17.867	Marker2383080	2.5	1.67514	6.1
Fruit diameter	2018		17.867	Marker1857600	2.51	1.67492	6.1
Fruit diameter	2018		18.118	Marker6659504	2.61	1.67071	6.4
Fruit diameter	2018		18.118	Marker467308	2.61	1.67074	6.4
Fruit diameter	2018		20.159	Marker3201861	2.61	1.67071	6.4
Fruit diameter	2018		20.159	Marker972967	2.61	1.67075	6.4
Fruit diameter	2018		21.588	Marker665678	2.5	1.67543	6.1
Fruit diameter	2018		21.588	Marker7092909	2.5	1.67542	6.1
Fruit diameter	2018		21.588	Marker4983363	2.5	1.67541	6.1
Fruit diameter	2018		21.588	Marker5182325	2.5	1.67538	6.1
Fruit diameter	2018		21.93	Marker3163055	2.51	1.67492	6.1
Fruit diameter	2018		22.168	Marker7922	2.51	1.67492	6.1
Fruit diameter	2018		22.168	Marker7598213	2.51	1.67492	6.1
Fruit diameter	2018		22.168	Marker634557	2.51	1.67492	6.1
Fruit diameter	2018		22.212	Marker8430018	2.5	1.67511	6.1
Fruit diameter	2018	10	65.643	Marker1696600	8.07	1.36239	23.6
Fruit diameter	2018		65.643	Marker5822819	8.06	1.36246	23.6
Fruit diameter	2018		65.643	Marker5666541	8.06	1.36253	23.6
Fruit diameter	2018		65.643	Marker2397277	8.05	1.3626	23.6
Fruit diameter	2018		65.643	Marker7868812	8.04	1.36267	23.6
Fruit diameter	2018		67.482	Marker7320711	5.56	1.37247	23.1
Fruit diameter	2018		67.482	Marker7614075	5.55	1.37247	23.1
Fruit diameter	2018		69.037	Marker265064	4.3	1.37251	23.1
Fruit diameter	2018		69.037	Marker1689143	4.14	1.37251	23.1
Fruit diameter	2018		69.037	Marker6435995	3.86	1.37252	23.1
Fruit diameter	2018		77.095	Marker1781870	7.7	1.37251	23.1
Fruit diameter	2018		77.095	Marker1269410	7.71	1.37251	23.1
Fruit diameter	2018		77.095	Marker8722308	7.72	1.37251	23.1
Fruit diameter	2018		77.095	Marker8662584	7.74	1.37251	23.1
Fruit diameter	2018		77.095	Marker7124989	5.5	1.37251	23.1
Fruit diameter	2018		80.678	Marker8618979	7.71	1.37251	23.1
Fruit diameter	2018		80.678	Marker3037966	7.7	1.37251	23.1
Fruit diameter	2018		81.18	Marker1269163	7.76	1.37251	23.1
Fruit diameter	2018		81.18	Marker1684649	7.74	1.37251	23.1
Fruit diameter	2018		81.934	Marker2002915	7.9	1.37251	23.1
Fruit diameter	2018		81.934	Marker8722282	7.91	1.37251	23.1
Fruit diameter	2018		81.934	Marker8729133	7.91	1.37251	23.1
Fruit diameter	2018		81.934	Marker6105113	7.91	1.37251	23.1
Fruit diameter	2018		81.934	Marker5109851	5.94	1.37251	23.1
Fruit diameter	2016	11	79.417	Marker8068447	2.93	0.736121	10
Fruit diameter	2016		79.417	Marker8617588	2.93	0.73611	10
Fruit diameter	2016		79.417	Marker5232094	2.93	0.736099	10
Fruit diameter	2016		79.417	Marker46619	2.93	0.736088	10
Fruit diameter	2016		79.417	Marker8028823	3.08	0.734552	10.2
Fruit diameter	2016		79.417	Marker5606477	3.08	0.734564	10.2
Fruit diameter	2016		79.417	Marker8601258	3.08	0.734576	10.2
Fruit diameter	2016		79.417	Marker2049707	3.08	0.734588	10.2
Fruit diameter	2016		79.417	Marker8109274	3.08	0.7346	10.2
Fruit diameter	2016		79.417	Marker6519849	3.08	0.734612	10.2
Fruit diameter	2016		79.417	Marker7182911	3.08	0.734624	10.2
Fruit diameter	2016		79.417	Marker7933849	3.08	0.734624	10.2
Fruit diameter	2016		79.417	Marker8018077	3.08	0.734624	10.2
Fruit diameter	2016		79.417	Marker2415189	3.08	0.734624	10.2
Fruit diameter	2016		79.417	Marker614583	3.08	0.734624	10.2
Fruit diameter	2016		79.417	Marker8199020	3.08	0.734623	10.2
Fruit diameter	2016		79.417	Marker8617204	3.08	0.734622	10.2
Fruit diameter	2016		107.551	Marker4720205	2.52	0.749331	8.4
Fruit diameter	2016		107.551	Marker7473807	2.51	0.749326	8.4
Fruit diameter	2016		107.551	Marker7889721	2.51	0.749321	8.4
Fruit diameter	2016		107.551	Marker8467764	2.51	0.749316	8.4
Fruit diameter	2016		107.551	Marker412525	2.51	0.749314	8.4
Fruit diameter	2016		107.551	Marker6676060	2.51	0.749306	8.4
Fruit diameter	2016		125.641	Marker6390795	2.5	0.749427	8.4
Fruit diameter	2016		125.641	Marker1034546	2.5	0.749431	8.4
Fruit diameter	2016		125.641	Marker8622470	2.5	0.749435	8.4
Fruit diameter	2016		125.641	Marker8438423	2.5	0.749438	8.4
Fruit diameter	2016		125.641	Marker375171	2.5	0.749442	8.4
Fruit diameter	2016		125.641	Marker833636	2.5	0.749446	8.4
Fruit diameter	2017	12	77.797	Marker5969912	5.37	60.2463	51.8
Fruit diameter	2017		77.797	Marker1084725	4.81	60.3001	51.7
Fruit diameter	2017		77.797	Marker6582102	4.8	60.3364	51.7
Fruit diameter	2017		77.797	Marker5527484	4.78	60.3731	51.7
Fruit diameter	2017		77.797	Marker750379	4.77	60.4099	51.6
Fruit diameter	2017		77.797	Marker5258995	4.75	60.4471	51.6
Fruit index	2017	1	0	Marker4903297	2.56	80.7499	13.4
Fruit index	2017		0	Marker4860648	2.56	80.7528	13.4
Fruit index	2017	2	66.093	Marker4008445	2.82	84.2503	9.7
Fruit index	2017		67.599	Marker4258718	2.59	85.2237	8.6
Fruit index	2017	4	102.173	Marker4544463	7.21	58.6092	37.2
Fruit index	2017		102.173	Marker7315018	7.2	58.6118	37.2
Fruit index	2017		102.173	Marker2968525	7.2	58.6158	37.2
Fruit index	2016	6	87.433	Marker1810487	2.6	0.0574863	8.7
Fruit index	2016		87.433	Marker1988407	2.6	0.0574863	8.7
Fruit index	2016		87.433	Marker393629	2.6	0.0574863	8.7
Fruit index	2016		87.433	Marker7361414	2.6	0.0574863	8.7
Fruit index	2016		87.433	Marker6049298	2.6	0.0574863	8.7
Fruit index	2016		87.433	Marker3227148	2.6	0.0574863	8.7
Fruit index	2016		87.433	Marker5973763	2.6	0.0574863	8.7
Fruit index	2016		87.433	Marker6940516	2.6	0.0574863	8.7
Fruit index	2016		87.684	Marker7188053	2.6	0.0574862	8.7
Fruit index	2016		87.684	Marker7604325	2.6	0.0574862	8.7
Fruit index	2016		87.935	Marker8176800	2.6	0.0574845	8.7
Fruit index	2016		87.935	Marker4454837	2.6	0.0574863	8.7
Fruit index	2016		87.935	Marker587645	2.6	0.0574863	8.7
Fruit index	2016		88.741	Marker8564969	2.61	0.0573335	8.9
Fruit index	2016		89.007	Marker7155188	2.61	0.0572753	9
Fruit index	2016		89.007	Marker6391861	2.61	0.0572734	9
Fruit index	2016		89.007	Marker6063524	2.61	0.0572715	9
Fruit index	2016		89.007	Marker3715976	2.61	0.0572696	9
Fruit index	2016		91.408	Marker2154108	2.69	0.0571412	9.2
Fruit index	2016		91.673	Marker6022756	2.74	0.0570862	9.3
Fruit index	2016		91.673	Marker5984259	2.74	0.0570879	9.3
Fruit index	2016		91.939	Marker7904977	2.73	0.0571536	9.2
Fruit index	2016		92.474	Marker8407448	2.72	0.0572383	9.1
Fruit index	2016		92.474	Marker6760319	2.72	0.0572398	9.1
Fruit index	2016		92.518	Marker391177	2.72	0.0572467	9.1
Fruit index	2016		92.518	Marker7771296	2.72	0.0572467	9.1
Fruit index	2016		92.518	Marker6941368	2.72	0.0572467	9.1
Fruit index	2016		92.518	Marker6769724	2.72	0.0572467	9.1
Fruit index	2016		92.518	Marker72215	2.72	0.0572467	9.1
Fruit index	2016		92.518	Marker5554036	2.72	0.0572292	9.1
Fruit index	2016		92.739	Marker5493809	2.72	0.0572121	9.1
Fruit index	2016		92.739	Marker8369738	2.72	0.0572105	9.1
Fruit index	2016		92.739	Marker5224941	2.72	0.0572089	9.1
Fruit index	2016		92.739	Marker1086817	2.72	0.0572074	9.1
Fruit index	2016		92.739	Marker7718050	2.72	0.0572058	9.1
Fruit index	2016		94.34	Marker1129725	2.78	0.0566775	10
Fruit index	2016		94.34	Marker7208681	2.78	0.0566794	10
Fruit index	2016		94.606	Marker5666359	2.77	0.0567291	9.9
Fruit index	2016		94.606	Marker6022757	2.77	0.0567309	9.9
Fruit index	2016		94.606	Marker6970399	2.77	0.0567328	9.9
Fruit index	2016		94.606	Marker4696280	2.77	0.0567346	9.9
Fruit index	2016		97.1	Marker8144636	2.6	0.0574852	8.7
Fruit index	2016		97.1	Marker4839145	2.6	0.0574863	8.7
Fruit index	2016		97.1	Marker2878306	2.6	0.0574863	8.7
Fruit index	2016		97.1	Marker3205233	2.6	0.0574863	8.7
Fruit index	2016		97.1	Marker6941363	2.6	0.0574863	8.7
Fruit index	2016		97.1	Marker8646658	2.6	0.0574863	8.7
Fruit index	2016		97.1	Marker391190	2.6	0.0574863	8.7
Fruit index	2016		97.603	Marker1885544	2.6	0.0574863	8.7
Fruit index	2016		97.603	Marker6941361	2.6	0.0574863	8.7
Fruit index	2016		97.603	Marker7440199	2.6	0.0574863	8.7
Fruit index	2016		97.603	Marker397778	2.6	0.0574863	8.7
Fruit index	2016		97.603	Marker4002351	2.6	0.0574863	8.7
Fruit index	2016		97.879	Marker8163426	2.6	0.0574347	8.8
Fruit index	2016		97.879	Marker6941464	2.6	0.0574328	8.8
Fruit index	2016		98.155	Marker4628457	2.62	0.0573656	8.9
Fruit index	2016		98.155	Marker2933006	2.62	0.0573638	8.9
Fruit index	2016		98.155	Marker4859719	2.61	0.057349	8.9
Fruit index	2016		98.431	Marker5905844	2.61	0.0570913	9.3
Fruit index	2016		98.431	Marker6165097	2.61	0.0570934	9.3
Fruit index	2016		98.431	Marker4860661	2.61	0.0570955	9.3
Fruit index	2016		98.431	Marker1635035	2.61	0.0570975	9.3
Fruit index	2016		98.707	Marker2592225	2.61	0.0571541	9.2
Fruit index	2016		98.707	Marker7835208	2.61	0.0571562	9.2
Fruit index	2016		100.406	Marker7840557	2.72	0.0572527	9.1
Fruit index	2016		100.406	Marker557270	2.72	0.0572514	9.1
Fruit index	2016		100.406	Marker594692	2.72	0.0572514	9.1
Fruit index	2016		100.406	Marker6941366	2.72	0.0572514	9.1
Fruit index	2016		101.872	Marker7767858	2.73	0.0569933	9.5
Fruit index	2016		101.872	Marker4451016	2.73	0.0569915	9.5
Fruit index	2016		101.872	Marker6827428	2.73	0.0569897	9.5
Fruit index	2016		101.872	Marker8192612	2.73	0.0569878	9.5
Fruit index	2016		101.872	Marker4304040	2.73	0.056986	9.5
Fruit index	2016		106.733	Marker8182840	2.74	0.0571572	9.2
Fruit index	2016		106.733	Marker8553078	2.74	0.057159	9.2
Fruit index	2016		106.733	Marker7853399	2.74	0.0571607	9.2
Fruit index	2016		106.733	Marker14292	2.74	0.0571624	9.2
Fruit index	2016		106.733	Marker8460317	2.74	0.0571642	9.2
Fruit index	2016		106.733	Marker8577897	2.74	0.0571659	9.2
Fruit index	2016		107.057	Marker594753	2.71	0.0572622	9
Fruit index	2016		107.057	Marker7034853	2.71	0.0572634	9
Fruit index	2016		107.057	Marker594683	2.71	0.0572645	9
Fruit index	2016		107.057	Marker6788668	2.71	0.0572657	9
Fruit index	2016		107.217	Marker2592425	2.71	0.0572664	9
Fruit index	2016		107.217	Marker6246035	2.71	0.0572654	9
Fruit index	2016		107.217	Marker3216390	2.71	0.0572644	9
Fruit index	2016		108.189	Marker6973797	2.78	0.0571336	9.2
Fruit index	2016		108.189	Marker667813	2.78	0.0571328	9.2
Fruit index	2016		108.642	Marker6378331	2.81	0.0570669	9.3
Fruit index	2016		108.642	Marker7264972	2.81	0.0570662	9.3
Fruit index	2016		108.642	Marker7260708	2.81	0.0570655	9.4
Fruit index	2016		108.672	Marker7814168	2.81	0.057066	9.3
Fruit index	2016		108.672	Marker2979394	2.81	0.0570668	9.3
Fruit index	2016		109.156	Marker8675335	2.79	0.0571086	9.3
Fruit index	2016		109.156	Marker5219248	2.79	0.0571095	9.3
Fruit index	2016		110.128	Marker5351764	2.73	0.0572335	9.1
Fruit index	2016		110.227	Marker594694	2.73	0.0572424	9.1
Fruit index	2016		110.227	Marker592968	2.73	0.0572424	9.1
Fruit index	2016		111.1	Marker5019727	2.73	0.0570838	9.3
Fruit index	2016		111.1	Marker3490027	2.73	0.057082	9.3
Fruit index	2016		111.1	Marker6477521	2.73	0.0570801	9.3
Fruit index	2016		111.1	Marker5640526	2.73	0.0570782	9.3
Fruit index	2016		111.584	Marker4753634	2.73	0.056987	9.5
Fruit index	2016		113.519	Marker7302035	2.95	0.0566979	9.9
Fruit index	2016		114.002	Marker8310479	2.97	0.0567396	9.9
Fruit index	2016		114.002	Marker1933119	2.97	0.0567416	9.9
Fruit index	2016		114.002	Marker1155531	2.97	0.0567435	9.9
Fruit index	2016		114.002	Marker3753627	2.97	0.0567455	9.9
Fruit index	2016		114.002	Marker8097769	2.97	0.0567475	9.9
Fruit index	2016		114.002	Marker7584208	2.97	0.0567495	9.9
Fruit index	2016		114.002	Marker593457	2.97	0.0567503	9.9
Fruit index	2016		114.002	Marker8249648	2.97	0.0567511	9.8
Fruit index	2016		114.002	Marker6941348	2.97	0.0567519	9.8
Fruit index	2016		114.002	Marker8249669	2.97	0.0567526	9.8
Fruit index	2016		114.608	Marker8399054	2.95	0.0566779	10
Fruit index	2016		114.608	Marker3673729	2.95	0.0566759	10
Fruit index	2016		114.608	Marker7131442	2.95	0.0566738	10
Fruit index	2016		114.608	Marker7934829	2.95	0.0566717	10
Fruit index	2016		115.214	Marker4585757	2.95	0.0565442	10.2
Fruit index	2016		115.214	Marker7935372	2.68	0.0572775	9
Fruit index	2016		115.214	Marker8182839	2.68	0.0572792	9
Fruit index	2016		115.214	Marker1133764	2.68	0.057281	9
Fruit index	2016		115.214	Marker5985137	2.68	0.0572828	9
Fruit index	2016		115.214	Marker5900693	2.68	0.0572845	9
Fruit index	2016		115.214	Marker3748129	2.68	0.0572863	9
Fruit index	2016		115.511	Marker129934	2.68	0.0573336	8.9
Fruit index	2016		115.511	Marker592963	2.68	0.0573334	8.9
Fruit index	2016		115.511	Marker8249267	2.68	0.0573333	8.9
Fruit index	2016		115.511	Marker129933	2.68	0.0573331	8.9
Fruit index	2016		115.82	Marker1641973	2.68	0.0572757	9
Fruit index	2016		115.82	Marker6419487	2.68	0.057274	9
Fruit index	2016		115.82	Marker8181902	2.68	0.0572723	9
Fruit index	2016		115.82	Marker8699892	2.68	0.0572706	9
Fruit index	2016		115.82	Marker4476279	2.75	0.0571543	9.2
Fruit index	2016		115.82	Marker2255717	2.95	0.0565489	10.2
Fruit index	2016		115.82	Marker4198469	2.95	0.056551	10.2
Fruit index	2016		116.122	Marker3524382	2.98	0.0565657	10.1
Fruit index	2016		116.423	Marker529004	2.98	0.0566276	10
Fruit index	2016		116.423	Marker2700059	2.98	0.0566297	10
Fruit index	2016		117.02	Marker593458	2.94	0.0568084	9.8
Fruit index	2016		117.02	Marker594817	2.94	0.0568094	9.8
Fruit index	2016		117.029	Marker8460199	2.94	0.0568085	9.8
Fruit index	2016		117.029	Marker648890	2.94	0.0568064	9.8
Fruit index	2016		117.029	Marker2592226	2.94	0.0568044	9.8
Fruit index	2016		117.331	Marker2627323	2.94	0.0567427	9.9
Fruit index	2016		117.331	Marker5661466	2.94	0.0567407	9.9
Fruit index	2016		119.447	Marker7994163	2.58	0.0574291	8.8
Fruit index	2016		119.447	Marker6941463	2.58	0.0574312	8.8
Fruit index	2016		119.447	Marker6430037	2.58	0.0574329	8.8
Fruit index	2016		119.447	Marker2740799	2.58	0.0574345	8.8
Fruit index	2016		119.447	Marker1795308	2.58	0.0574362	8.8
Fruit index	2016		120.053	Marker7478624	2.59	0.0575125	8.6
Fruit index	2016		120.053	Marker8476605	2.59	0.057514	8.6
Fruit index	2016		120.053	Marker7903202	2.59	0.0575125	8.6
Fruit index	2016		120.053	Marker5984106	2.59	0.057511	8.6
Fruit index	2016		120.053	Marker2943950	2.59	0.0575094	8.6
Fruit index	2016		120.053	Marker2399845	2.59	0.0575079	8.6
Fruit index	2016		120.053	Marker8699891	2.59	0.0575059	8.7
Fruit index	2016	7	10.207	Marker5214383	2.65	0.0573834	8.8
Fruit index	2016		11.217	Marker2130886	2.86	0.0569666	9.5
Fruit index	2016		11.217	Marker1337336	2.86	0.0569666	9.5
Fruit index	2016		11.217	Marker8717715	2.86	0.0569666	9.5
Fruit index	2016		12.227	Marker2468733	2.79	0.0571143	9.3
Fruit index	2016		12.729	Marker59755	2.79	0.0571143	9.3
Fruit index	2016		12.729	Marker3005285	2.79	0.0571143	9.3
Fruit index	2016		12.729	Marker1396274	2.79	0.0571143	9.3
Fruit index	2016		13.232	Marker642695	2.86	0.0569666	9.5
Fruit index	2016		13.232	Marker6701837	2.86	0.0569666	9.5
Fruit index	2016		13.232	Marker5506504	2.86	0.0569666	9.5
Fruit index	2016		13.232	Marker3632270	2.86	0.0569666	9.5
Fruit index	2016		13.232	Marker310512	2.86	0.0569666	9.5
Fruit index	2016		13.232	Marker6684267	2.86	0.0569666	9.5
Fruit index	2016		15.76	Marker5987331	2.65	0.0573834	8.8
Fruit index	2016		16.263	Marker610840	2.65	0.0573834	8.8
Fruit index	2016		16.263	Marker4467012	2.65	0.0573834	8.8
Fruit index	2016		23.457	Marker628280	2.86	0.0569666	9.5
Fruit index	2016		23.457	Marker469227	2.86	0.0569666	9.5
Fruit index	2016		23.457	Marker6389678	2.86	0.0569666	9.5
Fruit index	2016		23.457	Marker6390793	2.86	0.0569666	9.5
Fruit index	2016		23.457	Marker1530060	2.86	0.0569666	9.5
Fruit index	2016		23.457	Marker1015302	2.86	0.0569666	9.5
Fruit index	2016		23.959	Marker7127441	2.61	0.0574651	8.7
Fruit index	2016		23.959	Marker7438769	2.61	0.0574651	8.7
Fruit index	2016		24.97	Marker7477261	2.65	0.0573834	8.8
Fruit index	2016		24.97	Marker8470188	2.65	0.0573834	8.8
Fruit index	2016		24.97	Marker1694763	2.65	0.0573834	8.8
Fruit index	2016		24.97	Marker972685	2.65	0.0573834	8.8
Fruit index	2016		24.97	Marker4072912	2.65	0.0573834	8.8
Fruit index	2016		25.472	Marker829281	2.65	0.0573834	8.8
Fruit index	2016		26.995	Marker7272149	2.79	0.0571143	9.3
Fruit index	2016		26.995	Marker5799491	2.79	0.0571143	9.3
Fruit index	2016		26.995	Marker6105129	2.79	0.0571143	9.3
Fruit index	2016		26.995	Marker992570	2.79	0.0571143	9.3
Fruit index	2016		27.498	Marker6257373	2.86	0.0569666	9.5
Fruit index	2016		60.634	Marker6654866	2.56	0.0570784	9.3
Fruit index	2016		60.634	Marker4637047	2.56	0.0570763	9.3
Fruit index	2016		60.634	Marker6116601	2.56	0.0570813	9.3
Fruit index	2016		60.634	Marker3769351	2.56	0.0570862	9.3
Fruit index	2016		60.634	Marker8160286	2.56	0.0570911	9.3
Fruit index	2016		60.634	Marker2333648	2.56	0.057096	9.3
Fruit index	2016		61.916	Marker2345833	2.56	0.0575633	8.6
Fruit index	2016		61.916	Marker6702233	2.56	0.0575605	8.6
Fruit index	2016		61.916	Marker5687664	2.56	0.0575578	8.6
Fruit index	2016		61.916	Marker1464039	2.56	0.057555	8.6
Fruit index	2016		61.916	Marker3285728	2.56	0.0575777	8.5
Fruit index	2016		61.916	Marker585139	2.55	0.0575849	8.5
Fruit index	2016		76.389	Marker4529410	3.74	0.0552571	12.2
Fruit index	2016		76.389	Marker1162385	3.74	0.0552548	12.2
Fruit index	2016		76.389	Marker60390	3.74	0.0552528	12.2
Fruit index	2016		76.389	Marker1425086	3.77	0.0551706	12.4
Fruit index	2016		76.389	Marker8102952	3.78	0.0551441	12.4
Fruit index	2016		76.389	Marker4804511	3.8	0.0551	12.5
Fruit index	2016		76.389	Marker5524753	4.05	0.0545818	13.3
Fruit index	2016		76.389	Marker1550475	4.05	0.0545847	13.3
Fruit index	2016		76.389	Marker2636409	4.05	0.0545877	13.3
Fruit index	2016		76.641	Marker6496124	4.05	0.0546614	13.2
Fruit index	2016		76.641	Marker1980314	4.05	0.0546614	13.2
Fruit index	2016		76.641	Marker5986109	4.05	0.0546614	13.2
Fruit index	2016		76.641	Marker7912883	4.05	0.0546614	13.2
Fruit index	2016		76.641	Marker5995764	4.05	0.0546585	13.2
Fruit index	2016		76.641	Marker7020514	4.05	0.0546556	13.2
Fruit index	2016		76.641	Marker1212117	4.05	0.0546527	13.2
Fruit index	2016		76.641	Marker8553087	4.05	0.0546498	13.2
Fruit index	2016		76.641	Marker8611806	4.05	0.0546614	13.2
Fruit index	2016		76.641	Marker3864604	4.05	0.0546469	13.2
Fruit index	2016		76.641	Marker5294022	4.05	0.0546498	13.2
Fruit index	2016		76.641	Marker2910174	4.05	0.0546527	13.2
Fruit index	2016		76.641	Marker5342079	4.05	0.0546556	13.2
Fruit index	2016		76.641	Marker2881721	4.05	0.0546585	13.2
Fruit index	2016		76.641	Marker1397873	4.05	0.0546614	13.2
Fruit index	2016		76.641	Marker6613030	4.05	0.0546585	13.2
Fruit index	2016		76.641	Marker6434643	4.05	0.0546556	13.2
Fruit index	2016		76.641	Marker3425821	4.05	0.0546527	13.2
Fruit index	2016		76.641	Marker5991208	4.05	0.0546498	13.2
Fruit index	2016		76.641	Marker5420571	4.05	0.0546469	13.2
Fruit index	2016		76.641	Marker7154809	3.98	0.0541918	13.9
Fruit index	2016		76.641	Marker3646648	3.98	0.0543337	13.7
Fruit index	2016		76.641	Marker8699542	3.98	0.0543357	13.7
Fruit index	2016		76.641	Marker2984194	3.98	0.0543377	13.7
Fruit index	2016		76.641	Marker5430292	3.98	0.0543396	13.7
Fruit index	2016		76.641	Marker1061864	3.98	0.0543416	13.7
Fruit index	2016		78.998	Marker1059824	3.99	0.0547762	13
Fruit index	2016		78.998	Marker6980041	3.99	0.0547724	13
Fruit index	2016		80.281	Marker4802660	4.12	0.0542651	13.8
Fruit index	2016		80.786	Marker7965984	4.05	0.0541818	13.9
Fruit index	2016		80.786	Marker3468878	4.05	0.0541786	13.9
Fruit index	2016		80.786	Marker2470745	4.05	0.0541755	13.9
Fruit index	2016		80.786	Marker2301986	4.05	0.0541724	13.9
Fruit index	2016		80.786	Marker3147616	4.27	0.0540585	14.1
Fruit index	2016		80.786	Marker2986101	4.04	0.0545368	13.4
Fruit index	2016		80.786	Marker3554291	4.03	0.0545537	13.3
Fruit index	2016		80.786	Marker6093164	4.03	0.0545566	13.3
Fruit index	2016		80.786	Marker7051710	4.03	0.0545594	13.3
Fruit index	2016		80.786	Marker68913	4.03	0.0545622	13.3
Fruit index	2016		81.291	Marker3946852	4.11	0.0545416	13.4
Fruit index	2016		81.291	Marker640699	4.11	0.0545416	13.4
Fruit index	2016		81.291	Marker5982933	4.11	0.0545417	13.4
Fruit index	2016		82.573	Marker1470003	3.98	0.0545466	13.4
Fruit index	2016		82.573	Marker6424516	3.98	0.0545448	13.4
Fruit index	2016		82.573	Marker7996796	3.98	0.0545429	13.4
Fruit index	2016		82.573	Marker868628	3.98	0.054541	13.4
Fruit index	2016		82.573	Marker5768609	3.98	0.0545392	13.4
Fruit index	2016		83.856	Marker8261018	2.57	0.0575512	8.6
Fruit index	2016		84.107	Marker2528105	4.31	0.0540292	14.2
Fruit index	2016		84.107	Marker7160626	4.21	0.054175	13.9
Fruit index	2016		84.358	Marker3397643	4.17	0.0542907	13.8
Fruit index	2016		84.358	Marker4734033	4.17	0.0542935	13.8
Fruit index	2016		84.358	Marker6155144	3.69	0.0552315	12.3
Fruit index	2016		84.358	Marker5432779	4.27	0.0541738	13.9
Fruit index	2016		84.609	Marker3946853	4.27	0.0542445	13.8
Fruit index	2016		85.63	Marker6877962	4.33	0.054083	14.1
Fruit index	2016		85.63	Marker868490	4.33	0.0540855	14.1
Fruit index	2016		85.63	Marker1977226	4.33	0.0540881	14.1
Fruit index	2016		86.391	Marker5284933	4.03	0.0547028	13.1
Fruit index	2016		86.391	Marker3012894	3.87	0.0549168	12.8
Fruit index	2016		86.391	Marker3555942	4.02	0.0547032	13.1
Fruit index	2016		86.391	Marker5787047	4.02	0.0547005	13.1
Fruit index	2016		86.391	Marker187938	4.02	0.0546978	13.1
Fruit index	2016		86.391	Marker2946419	4.03	0.0546874	13.1
Fruit index	2016		87.412	Marker3933692	2.61	0.0574651	8.7
Fruit index	2016		87.412	Marker5824740	2.61	0.0574651	8.7
Fruit index	2016		89.226	Marker2242689	2.65	0.0573834	8.8
Fruit index	2016		89.226	Marker641326	2.65	0.0573834	8.8
Fruit index	2016		90.247	Marker3875430	2.65	0.0573834	8.8
Fruit index	2016		90.247	Marker7119811	2.65	0.0573834	8.8
Fruit index	2016		90.247	Marker2756613	2.65	0.0573834	8.8
Fruit index	2016		90.498	Marker2983641	2.61	0.0574651	8.7
Fruit index	2016		90.498	Marker4678215	2.61	0.0574651	8.7
Fruit index	2016		90.749	Marker3222162	2.65	0.0573834	8.8
Fruit index	2016		91.001	Marker627942	4.13	0.054409	13.6
Fruit index	2016		91.001	Marker6015057	4.13	0.0544112	13.6
Fruit index	2016		91.001	Marker7070645	4.13	0.0544132	13.6
Fruit index	2016		91.506	Marker3397582	4.03	0.0546931	13.1
Fruit index	2016		91.506	Marker8160819	4.03	0.0546958	13.1
Fruit index	2016		91.506	Marker5985429	4.03	0.0546985	13.1
Fruit index	2016		91.506	Marker1796259	4.03	0.0547012	13.1
Fruit index	2016		91.506	Marker7127405	4.03	0.0546985	13.1
Fruit index	2016		91.506	Marker1399553	4.03	0.0546958	13.1
Fruit index	2016		91.506	Marker5886144	4.03	0.0546931	13.1
Fruit index	2016		91.506	Marker5701499	4.03	0.0546904	13.1
Fruit index	2016		91.506	Marker4350237	4.03	0.0546874	13.1
Fruit index	2016		91.506	Marker7127434	3.58	0.0553323	12.1
Fruit index	2016		91.506	Marker4282281	3.58	0.0553342	12.1
Fruit index	2016		91.506	Marker457184	3.58	0.0553362	12.1
Fruit index	2016		92.138	Marker1061077	3.63	0.055357	12.1
Fruit index	2016		92.138	Marker7168890	3.63	0.0553587	12.1
Fruit index	2016		92.138	Marker3218955	3.63	0.0553603	12.1
Fruit index	2016		92.77	Marker2422522	3.58	0.0555656	11.7
Fruit index	2016		92.77	Marker1717943	3.58	0.0555673	11.7
Fruit index	2016		92.77	Marker6434819	3.58	0.0555673	11.7
Fruit index	2016		92.77	Marker3946850	3.58	0.0555673	11.7
Fruit index	2016		93.021	Marker3231127	3.58	0.0555244	11.8
Fruit index	2016		93.782	Marker7892277	3.42	0.0556996	11.5
Fruit index	2016		93.782	Marker7506772	3.42	0.0556979	11.5
Fruit index	2016		94.544	Marker2952758	3.7	0.0550778	12.5
Fruit index	2016		94.544	Marker7127425	3.7	0.0550617	12.5
Fruit index	2016		95.049	Marker2147518	3.61	0.0553258	12.1
Fruit index	2016		95.81	Marker2397290	3.63	0.0553742	12
Fruit index	2016		95.81	Marker2949729	3.63	0.0553758	12
Fruit index	2016		96.315	Marker1430224	3.58	0.0555622	11.7
Fruit index	2016		96.315	Marker1760823	3.58	0.0555639	11.7
Fruit index	2016		96.315	Marker2213331	3.58	0.0555656	11.7
Fruit index	2016		96.315	Marker2976748	3.58	0.0555673	11.7
Fruit index	2016		96.315	Marker6863350	3.58	0.0555656	11.7
Fruit index	2016		96.315	Marker57693	3.58	0.0555639	11.7
Fruit index	2016		96.315	Marker583248	3.58	0.0555622	11.7
Fruit index	2016		96.315	Marker3009453	3.58	0.0555605	11.7
Fruit index	2016		96.315	Marker2842737	3.58	0.0555585	11.7
Fruit index	2016		97.706	Marker2593362	2.53	0.0576367	8.4
Fruit index	2016		99.453	Marker7615961	3.59	0.0551708	12.4
Fruit index	2016		101.588	Marker3718240	3.53	0.0555943	11.7
Fruit index	2016		101.935	Marker6127109	3.48	0.0557414	11.5
Fruit index	2016		101.935	Marker3539712	3.48	0.0557431	11.5
Fruit index	2016		101.935	Marker5040494	3.48	0.0557448	11.4
Fruit index	2016		101.935	Marker8160820	3.48	0.0557465	11.4
Fruit index	2016		101.935	Marker6612177	3.48	0.0557462	11.4
Fruit index	2016		102.48	Marker1694807	3.6	0.0554484	11.9
Fruit index	2016		102.48	Marker299640	3.6	0.0554473	11.9
Fruit index	2016		102.48	Marker467776	3.6	0.0554461	11.9
Fruit index	2016		102.48	Marker3554281	3.6	0.0554449	11.9
Fruit index	2016		103.025	Marker622883	3.6	0.0554107	12
Fruit index	2016		103.025	Marker310247	2.79	0.0571143	9.3
Fruit index	2016		103.025	Marker1204895	2.79	0.0571143	9.3
Fruit index	2016		103.025	Marker6741078	2.79	0.0571143	9.3
Fruit index	2016		103.025	Marker7966386	2.79	0.0571143	9.3
Fruit index	2016		103.848	Marker6260395	2.53	0.0576367	8.4
Fruit index	2016		104.933	Marker2420355	2.57	0.0575512	8.6
Fruit index	2016		108.225	Marker7160011	3.78	0.0550564	12.5
Fruit index	2016		108.225	Marker2984250	3.77	0.0550868	12.5
Fruit index	2016		108.225	Marker991520	3.77	0.0550887	12.5
Fruit index	2016		108.225	Marker4806538	3.77	0.0550905	12.5
Fruit index	2016		108.496	Marker1800475	3.76	0.0551592	12.4
Fruit index	2016		108.496	Marker2952530	3.76	0.0551611	12.4
Fruit index	2016		108.768	Marker3946851	3.78	0.0551785	12.3
Fruit index	2016		109.177	Marker2417091	3.77	0.055117	12.4
Fruit index	2016		109.177	Marker7834827	3.77	0.0551152	12.4
Fruit index	2016		110.001	Marker1393292	3.64	0.0552019	12.3
Fruit index	2016		111.243	Marker6527265	3.88	0.0545478	13.3
Fruit index	2016		111.243	Marker8006962	3.88	0.0545262	13.4
Fruit index	2016		111.243	Marker8586265	3.69	0.0548705	12.8
Fruit index	2016		111.243	Marker5995767	3.69	0.054921	12.8
Fruit index	2016		111.243	Marker1720341	3.69	0.0549224	12.8
Fruit index	2016		111.243	Marker8345349	3.69	0.0549238	12.8
Fruit index	2016		111.243	Marker64809	3.69	0.0549251	12.8
Fruit index	2016		113.334	Marker3650581	3.63	0.0553292	12.1
Fruit index	2016		114.157	Marker7740236	3.58	0.0555673	11.7
Fruit index	2016		114.157	Marker8469299	3.58	0.0555656	11.7
Fruit index	2016		114.662	Marker8501950	3.71	0.0552536	12.2
Fruit index	2016		114.662	Marker4106566	3.71	0.0552524	12.2
Fruit index	2016		114.662	Marker7424668	3.71	0.0552512	12.2
Fruit index	2016		114.662	Marker2691037	3.71	0.0552498	12.2
Fruit index	2016		114.662	Marker2987261	2.61	0.0574651	8.7
Fruit index	2016		114.662	Marker6569739	2.61	0.0574651	8.7
Fruit index	2016		114.662	Marker1671825	2.61	0.0574651	8.7
Fruit index	2016		114.914	Marker641127	2.86	0.0569666	9.5
Fruit index	2016		114.914	Marker4923428	2.86	0.0569666	9.5
Fruit index	2016		114.914	Marker3009098	2.86	0.0569666	9.5
Fruit index	2016		114.914	Marker7506110	2.86	0.0569666	9.5
Fruit index	2016		115.165	Marker1881854	2.61	0.0574651	8.7
Fruit index	2016		119.529	Marker615067	2.86	0.0569666	9.5
Fruit index	2016		119.529	Marker4676549	2.86	0.0569666	9.5
Fruit index	2016		119.529	Marker3462746	2.86	0.0569666	9.5
Fruit index	2016		119.529	Marker7612112	2.86	0.0569666	9.5
Fruit index	2016		119.529	Marker870007	2.86	0.0569666	9.5
Fruit index	2016		119.78	Marker2237914	2.79	0.0571143	9.3
Fruit index	2016		119.78	Marker6701839	2.79	0.0571143	9.3
Fruit index	2016		119.78	Marker8522585	2.79	0.0571143	9.3
Fruit index	2016		120.285	Marker4733634	3.14	0.056412	10.4
Fruit index	2016		120.285	Marker4659896	3.14	0.056412	10.4
Fruit index	2016		120.285	Marker5981935	3.14	0.056412	10.4
Fruit index	2016		121.832	Marker5383086	3.41	0.0559003	11.2
Fruit index	2016		121.832	Marker1336086	3.41	0.0559003	11.2
Fruit index	2016		121.832	Marker3644600	3.41	0.0559003	11.2
Fruit index	2016		121.832	Marker7120274	3.41	0.0559003	11.2
Fruit index	2016		121.832	Marker4561794	3.41	0.0559003	11.2
Fruit index	2016		121.832	Marker4923430	3.41	0.0559003	11.2
Fruit index	2016		121.832	Marker7887467	4.35	0.0537014	14.7
Fruit index	2016		123.379	Marker3211304	4.18	0.0542555	13.8
Fruit index	2016		124.14	Marker3860247	3.94	0.0547927	13
Fruit index	2016		124.391	Marker6047504	3.7	0.055264	12.2
Fruit index	2016		124.391	Marker1461372	3.7	0.0552652	12.2
Fruit index	2016		124.643	Marker297383	3.7	0.0552944	12.2
Fruit index	2016		124.894	Marker5284932	3.57	0.0555742	11.7
Fruit index	2016		124.894	Marker92365	3.57	0.0555774	11.7
Fruit index	2016		125.696	Marker3718246	3.62	0.0553435	12.1
Fruit index	2016		125.696	Marker5040493	3.62	0.0553419	12.1
Fruit index	2016		128.128	Marker3600521	3.41	0.05532	12.1
Fruit index	2016		128.93	Marker675510	3.59	0.0549473	12.7
Fruit index	2016		137.199	Marker60035	2.86	0.0569666	9.5
Fruit index	2016		137.199	Marker5986061	2.86	0.0569666	9.5
Fruit index	2016		138.002	Marker1463997	2.79	0.0571143	9.3
Fruit index	2016		138.002	Marker4923429	2.79	0.0571143	9.3
Fruit index	2016		143.795	Marker5939331	3.36	0.0559958	11
Fruit index	2016		144.597	Marker3066452	3.41	0.0559003	11.2
Fruit index	2016		144.597	Marker543209	3.41	0.0559003	11.2
Fruit index	2016		146.21	Marker4215913	3.41	0.0559003	11.2
Fruit index	2016		147.012	Marker7932888	3.24	0.0561161	10.9
Fruit index	2016		147.012	Marker8569027	3.23	0.056175	10.8
Fruit index	2016		148.625	Marker8482051	2.83	0.0570247	9.4
Fruit index	2016		148.625	Marker2798542	2.83	0.0570247	9.4
Fruit index	2016		148.625	Marker3913782	2.83	0.0570247	9.4
Fruit index	2016		149.427	Marker1746178	2.74	0.0572062	9.1
Fruit index	2016		150.23	Marker5982889	2.83	0.0570258	9.4
Fruit index	2016		150.23	Marker8482052	2.83	0.0570258	9.4
Fruit index	2016		150.23	Marker309073	2.83	0.0570258	9.4
Fruit index	2016		150.781	Marker1741711	2.62	0.0574335	8.8
Fruit index	2016		150.781	Marker1741568	2.62	0.0574335	8.8
Fruit index	2016		151.055	Marker233312	2.57	0.057537	8.6
Fruit index	2016		151.317	Marker8554083	2.85	0.05696	9.5
Fruit index	2016		152.384	Marker233314	2.92	0.0567404	9.9
Fruit index	2016		152.384	Marker2562217	2.92	0.0567399	9.9
Fruit index	2016		152.384	Marker5844414	2.92	0.0567393	9.9
Fruit index	2016		152.384	Marker4843482	2.92	0.0567404	9.9
Fruit index	2016		152.384	Marker3120466	2.92	0.0567404	9.9
Fruit index	2016		152.652	Marker4033267	3.15	0.0562804	10.6
Fruit index	2016		152.652	Marker954233	3.15	0.0562631	10.6
Fruit index	2016		152.652	Marker8387321	3.15	0.0562637	10.6
Fruit index	2016		152.919	Marker3632250	2.92	0.0567399	9.9
Fruit index	2016		152.919	Marker233315	2.92	0.0567404	9.9
Fruit index	2016		153.467	Marker2637514	2.92	0.0567107	9.9
Fruit index	2016		153.467	Marker7461566	2.92	0.0567102	9.9
Fruit index	2016		153.467	Marker4076712	2.92	0.0567096	9.9
Fruit index	2016		153.467	Marker8387322	2.92	0.0567091	9.9
Fruit index	2016		153.467	Marker2257425	2.92	0.0567056	9.9
Fruit index	2016		153.467	Marker1997405	2.71	0.0572801	9
Fruit index	2016		154.293	Marker4303303	2.71	0.0572801	9
Fruit index	2016		154.293	Marker2257426	2.71	0.0572801	9
Fruit index	2016		154.293	Marker1407512	2.71	0.0572801	9
Fruit index	2016		154.293	Marker79128	2.71	0.0572801	9
Fruit index	2016		154.293	Marker79129	2.71	0.0572801	9
Fruit index	2016		154.293	Marker8384011	2.71	0.0572801	9
Fruit index	2016		154.293	Marker4516199	2.71	0.0572801	9
Fruit index	2016		154.293	Marker8599246	2.71	0.0572801	9
Fruit index	2016		154.565	Marker7726800	2.71	0.0572801	9
Fruit index	2016		155.113	Marker5822317	2.71	0.0572801	9
Fruit index	2016		155.113	Marker7493980	2.71	0.0572801	9
Fruit index	2016		155.113	Marker4303302	2.71	0.0572801	9
Fruit index	2016		155.386	Marker8449573	2.72	0.0572534	9.1
Fruit index	2016		155.386	Marker1828619	2.72	0.0572534	9.1
Fruit index	2016		163.408	Marker1039782	2.51	0.0574013	8.8
Fruit index	2016		163.408	Marker2383867	2.51	0.057402	8.8
Fruit index	2016		163.408	Marker5705984	2.51	0.0574025	8.8
Fruit index	2016		163.408	Marker4867106	2.51	0.0574029	8.8
Fruit index	2017		60.634	Marker6654866	3.81	67.3072	27.8
Fruit index	2017		60.634	Marker4637047	3.48	67.7379	27.4
Fruit index	2017		60.634	Marker6116601	3.47	67.7573	27.4
Fruit index	2017		60.634	Marker3769351	3.46	67.7769	27.3
Fruit index	2017		60.634	Marker8160286	3.45	67.7968	27.3
Fruit index	2017		60.634	Marker2333648	3.44	67.8168	27.3
Fruit index	2017		61.916	Marker585139	2.51	78.5131	15.8
Fruit index	2016	9	175.722	Marker8663575	2.56	0.0573919	8.8
Fruit index	2016		178.443	Marker7933242	2.64	0.0573146	9
Fruit index	2016		178.443	Marker2228091	2.64	0.0573138	9
Fruit index	2016		178.443	Marker1594703	2.63	0.0573383	8.9
Fruit index	2016		179.347	Marker2806462	2.65	0.0572671	9
Fruit index	2016		179.347	Marker2167458	2.65	0.0572669	9
Fruit index	2016		179.347	Marker5949832	2.6	0.0572666	9
Fruit index	2016		179.347	Marker7338679	2.6	0.0572674	9
Fruit index	2016		179.347	Marker4936560	2.6	0.0572681	9
Fruit index	2017	10	0	Marker2057316	2.77	55.2107	40.8
Fruit index	2017		1.523	Marker2634088	2.51	59.9541	35.7
Fruit index	2017		32.872	Marker5794082	2.76	69.6487	25.3
Fruit index	2017		37.344	Marker766355	4.41	62.3994	33.1
Fruit index	2017		38.653	Marker3471464	5.82	63.6739	31.7
Fruit index	2017		40.505	Marker3930559	4.95	63.7991	31.6
Fruit index	2017		45.687	Marker5172860	6.38	63.2882	32.2
Fruit index	2017		45.687	Marker8450607	6.38	63.2862	32.2
Fruit index	2017		45.687	Marker2516583	6.38	63.2842	32.2
Fruit index	2017		45.687	Marker265097	6.38	63.2822	32.2
Fruit index	2017		45.687	Marker6031822	6.41	63.2336	32.2
Fruit index	2017		45.967	Marker5197396	3.43	54.6517	41.4
Fruit index	2017		47.592	Marker5417105	3.52	68.5686	26.5
Fruit index	2017		47.592	Marker276459	3.54	68.476	26.6
Fruit index	2017		47.844	Marker4705389	2.78	69.2827	25.7
Fruit index	2017		47.844	Marker6835561	2.8	69.2336	25.8
Fruit index	2017		64.888	Marker6793030	3.23	70.1614	24.8
Fruit index	2017		65.265	Marker2571460	2.77	69.3454	25.7
Fruit index	2017		65.265	Marker5105814	2.79	69.2949	25.7
Fruit index	2017		65.265	Marker1371105	2.8	69.2456	25.8
Fruit index	2017		65.265	Marker1270999	3.04	68.5721	26.5
Fruit index	2017		66.02	Marker1310619	4.34	66.153	29.1
Fruit index	2017		66.309	Marker2354065	5.3	54.436	41.6
Fruit index	2017		66.309	Marker1702833	5.28	54.4964	41.6
Fruit index	2017		73.823	Marker7853206	3.78	67.1507	28
Fruit index	2017		73.823	Marker1930232	3.8	67.1056	28.1
Fruit index	2017		73.823	Marker987719	3.81	67.0616	28.1
Fruit index	2017		73.823	Marker3926715	3.83	67.0186	28.2
Fruit index	2017		73.823	Marker1269614	3.05	68.5169	26.5
Fruit index	2017		75.333	Marker1273442	3.02	72.2854	22.5
Fruit index	2017		75.333	Marker5099086	2.99	72.5467	22.2
Fruit index	2017		75.333	Marker5200611	2.96	72.818	21.9
Fruit index	2017		75.333	Marker4971984	2.93	73.0989	21.6
Fruit index	2017		75.333	Marker1271274	2.9	73.3882	21.3
Fruit index	2017		75.836	Marker2572183	2.99	72.5734	22.2
Fruit index	2018		37.344	Marker766355	16.02	0.17219	51.9
Fruit index	2018		38.653	Marker3471464	16.47	0.196081	45.2
Fruit index	2018		40.505	Marker3930559	17.21	0.193754	45.9
Fruit index	2018		41.814	Marker5701662	14.46	0.192357	46.3
Fruit index	2018		41.814	Marker7858724	12.59	0.194687	45.6
Fruit index	2018		45.687	Marker5172860	17.24	0.195993	45.3
Fruit index	2018		45.687	Marker8450607	17.23	0.195993	45.3
Fruit index	2018		45.687	Marker2516583	17.23	0.195993	45.3
Fruit index	2018		45.687	Marker265097	17.23	0.195993	45.3
Fruit index	2018		45.687	Marker6031822	16.54	0.193834	45.9
Fruit index	2018		65.643	Marker1696600	21.59	0.194702	45.6
Fruit index	2018		65.643	Marker5822819	21.58	0.194704	45.6
Fruit index	2018		65.643	Marker5666541	21.57	0.194706	45.6
Fruit index	2018		65.643	Marker2397277	21.57	0.194708	45.6
Fruit index	2018		65.643	Marker7868812	21.56	0.19471	45.6
Fruit index	2018		66.309	Marker2354065	19.37	0.195857	45.3
Fruit index	2018		66.309	Marker1702833	19.36	0.195857	45.3
Fruit index	2018		67.482	Marker7320711	18.96	0.196542	45.1
Fruit index	2018		67.482	Marker7614075	18.95	0.196543	45.1
Fruit index	2018		69.037	Marker265064	17.7	0.196554	45.1
Fruit index	2018		69.037	Marker1689143	17.55	0.196554	45.1
Fruit index	2018		69.037	Marker6435995	17.26	0.196554	45.1
Fruit index	2018		77.095	Marker1781870	21.1	0.196554	45.1
Fruit index	2018		77.095	Marker1269410	21.11	0.196554	45.1
Fruit index	2018		77.095	Marker8722308	21.13	0.196554	45.1
Fruit index	2018		77.095	Marker8662584	21.14	0.196554	45.1
Fruit index	2018		77.095	Marker7124989	18.9	0.196554	45.1
Fruit index	2018		80.678	Marker8618979	21.11	0.196554	45.1
Fruit index	2018		80.678	Marker3037966	21.1	0.196554	45.1
Fruit index	2018		81.18	Marker1269163	21.16	0.196554	45.1
Fruit index	2018		81.18	Marker1684649	21.15	0.196554	45.1
Fruit index	2018		81.934	Marker2002915	21.3	0.196554	45.1
Fruit index	2018		81.934	Marker8722282	21.31	0.196554	45.1
Fruit index	2018		81.934	Marker8729133	21.31	0.196554	45.1
Fruit index	2018		81.934	Marker6105113	21.32	0.196554	45.1
Fruit index	2018		81.934	Marker5109851	19.35	0.196554	45.1
Fruit index	2016	11	70.738	Marker3079097	2.77	0.0571573	9.2
Fruit index	2016		70.738	Marker7865023	2.77	0.0571573	9.2
Fruit index	2016		71.749	Marker5178294	2.77	0.0571573	9.2
Fruit index	2016		71.749	Marker8671252	2.77	0.0571573	9.2
Fruit index	2016		126.908	Marker5241798	2.5	0.0573374	8.9
Fruit index	2016		126.908	Marker1824603	2.86	0.0563311	10.5
Fruit index	2016		126.908	Marker2440552	2.5	0.0576848	8.4
Fruit index	2016		137.174	Marker6016238	2.77	0.0569839	9.5
Fruit index	2016		137.174	Marker1324041	2.77	0.0569845	9.5
Fruit index	2016		137.174	Marker4026587	2.77	0.0569851	9.5
Fruit index	2016		137.174	Marker7935094	2.77	0.0569857	9.5
Fruit index	2016		137.174	Marker8160787	2.77	0.0569863	9.5
Fruit index	2016		137.174	Marker8329815	2.77	0.0569869	9.5
Fruit index	2016		139.532	Marker181910	2.76	0.0566886	9.9
Fruit index	2016		139.532	Marker2627714	2.76	0.0566867	10
Fruit index	2016		139.532	Marker4908035	2.76	0.0566847	10
Fruit index	2016		139.532	Marker223288	2.76	0.0566828	10
Fruit index	2016		139.532	Marker8173680	2.76	0.0566808	10
Fruit index	2016		139.783	Marker3707070	2.75	0.0571347	9.2
Fruit index	2016		139.783	Marker7252261	2.75	0.057137	9.2
Fruit index	2016		140.034	Marker181907	2.78	0.0571175	9.3
Fruit index	2016		140.034	Marker4671749	2.78	0.0571193	9.3
Fruit index	2016		140.034	Marker7403766	2.78	0.057121	9.3
Fruit index	2016		140.034	Marker2089138	2.78	0.0571228	9.3
Fruit index	2016		140.034	Marker8173682	2.78	0.0571246	9.3
Fruit index	2016		140.034	Marker6282527	2.78	0.057124	9.3
Fruit index	2016		140.034	Marker1555968	2.78	0.0571245	9.3
Fruit index	2016		140.034	Marker7049964	2.78	0.0571245	9.3
Fruit index	2016		140.034	Marker730176	2.78	0.0571245	9.3
Fruit index	2016		140.034	Marker5604318	2.78	0.0571245	9.3
Fruit index	2016		140.034	Marker6230175	2.78	0.0570653	9.4
Fruit index	2016		140.034	Marker644788	2.78	0.0570659	9.3
Fruit index	2016		141.047	Marker1491130	2.8	0.0570992	9.3
Fruit index	2016		141.047	Marker1500944	2.75	0.0571894	9.2
Fruit index	2016		142.261	Marker3940725	2.73	0.0571555	9.2
Fruit index	2016		142.261	Marker5055852	2.73	0.0571549	9.2
Fruit index	2016		142.261	Marker729392	2.73	0.0571544	9.2
Fruit index	2016		142.261	Marker1558638	2.78	0.0570541	9.4
Fruit index	2016		142.261	Marker5899694	2.65	0.057298	9
Fruit index	2017	12	81.568	Marker7920916	5.44	58.2254	37.6
